# Supplementary material
Source: ML conference proceedings conference paper supplement (https://openreview.net/forum?id=rH8yliN6C83)
Supplement: supplementary_material [file attachment]

# AP-10K: A Benchmark for Animal Pose Estimation in the Wild: Supplementary Material

Hang Yu<sup>1\*</sup>, Yufei Xu<sup>2\*</sup>, Jing Zhang<sup>2†</sup>, Wei Zhao<sup>1†</sup>, Ziyu Guan<sup>1</sup>, Dacheng Tao<sup>2,3</sup>

<sup>1</sup>Xidian University, China, <sup>2</sup>The University of Sydney, Australia, <sup>3</sup>JD Explore Academy, China

## A Appendix

### A.1 More quantitative and qualitative results

Table S1: The complete results of different models on the validation set of the SL track.

| Pretraining on ImageNet | AP                | AP <sub>.5</sub>  | AP <sub>.75</sub> | AP <sub>M</sub>   | AP <sub>L</sub>   |
|-------------------------|-------------------|-------------------|-------------------|-------------------|-------------------|
| HRNet-w32 [13]          | 0.738 $\pm$ 0.006 | 0.958 $\pm$ 0.004 | 0.808 $\pm$ 0.007 | 0.592 $\pm$ 0.074 | 0.743 $\pm$ 0.006 |
| HRNet-w48 [13]          | 0.744 $\pm$ 0.004 | 0.959 $\pm$ 0.002 | 0.807 $\pm$ 0.006 | 0.589 $\pm$ 0.042 | 0.748 $\pm$ 0.003 |
| ResNet50 [7]            | 0.699 $\pm$ 0.004 | 0.940 $\pm$ 0.003 | 0.760 $\pm$ 0.003 | 0.570 $\pm$ 0.078 | 0.703 $\pm$ 0.004 |
| ResNet101 [7]           | 0.698 $\pm$ 0.002 | 0.943 $\pm$ 0.002 | 0.754 $\pm$ 0.007 | 0.543 $\pm$ 0.070 | 0.702 $\pm$ 0.001 |
| Hourglass [10]          | 0.729 $\pm$ 0.001 | 0.951 $\pm$ 0.002 | 0.793 $\pm$ 0.002 | 0.606 $\pm$ 0.042 | 0.733 $\pm$ 0.001 |
| Training from scratch   | AP                | AP <sub>.5</sub>  | AP <sub>.75</sub> | AP <sub>M</sub>   | AP <sub>L</sub>   |
| HRNet-w32 [13]          | 0.703 $\pm$ 0.002 | 0.940 $\pm$ 0.001 | 0.764 $\pm$ 0.004 | 0.599 $\pm$ 0.020 | 0.707 $\pm$ 0.003 |
| HRNet-w48 [13]          | 0.711 $\pm$ 0.003 | 0.943 $\pm$ 0.002 | 0.771 $\pm$ 0.004 | 0.604 $\pm$ 0.047 | 0.715 $\pm$ 0.003 |
| ResNet50 [7]            | 0.646 $\pm$ 0.001 | 0.913 $\pm$ 0.006 | 0.694 $\pm$ 0.007 | 0.522 $\pm$ 0.053 | 0.649 $\pm$ 0.002 |
| ResNet101 [7]           | 0.667 $\pm$ 0.002 | 0.924 $\pm$ 0.003 | 0.715 $\pm$ 0.003 | 0.542 $\pm$ 0.042 | 0.671 $\pm$ 0.002 |
| Hourglass [10]          | 0.686 $\pm$ 0.006 | 0.933 $\pm$ 0.003 | 0.739 $\pm$ 0.011 | 0.591 $\pm$ 0.027 | 0.690 $\pm$ 0.004 |

In this Appendix, we provide the full evaluation results of HRNet-W32 [13], HRNet-w48 [13], SimpleBaseline [15] with ResNet50 [7] and ResNet101 [7] and Hourglass [10] in terms of different evaluation metrics on the validation set of the SL Track, as shown in Table S1. It shows that the advanced network structure like HRNet [13] outperforms the other backbones on most categories in terms of all evaluation metrics. It also demonstrates that pretraining on ImageNet can accelerate the convergence speed and achieve a better performance than training from scratch.

Besides, we also present the per species results of HRNet-W32 [13] on the test set the SL Track at the settings of “Pretraining on ImageNet” and “Training from scratch” in Table S2 and Table S3, respectively. We also provide another test result which contains 56 animals for reference. *i.e.*, Dividing Dog into Chihuahua, Collie, Dog, dalmatian and German Shepherd, dividing Cat into cat and Perisian Cat and Siamese Cat. As we have mentioned in ??, Dog and Cat varies widely in appearance owing to human’s cultivation for family pets.

Comparing Table S2 with the last rows in Table ??, Table ?? and Table ?? in the paper, where all the scores represent test performance on seen species, we can find that using the same amount of training data but from more diverse species can help the model learning better feature representation and achieve better performance, *e.g.*, the mAP for Sheep is 0.663 v.s. 0.761, which is obtained by the model trained only using the Bovidae family). This observation further confirms the value of our AP-10K dataset.

\*Equal contribution. †Corresponding author.

Table S2: Per-species results of HRNet-w32 [13] on the test set the SL Track at the setting of pretraining on ImageNet.

| species            | AP                | AP.5              | AP.75             | AP(M)             | AP(L)             |
|--------------------|-------------------|-------------------|-------------------|-------------------|-------------------|
| Antelope           | 0.856 $\pm$ 0.014 | 0.969 $\pm$ 0.008 | 0.924 $\pm$ 0.007 | 0.732 $\pm$ 0.024 | 0.869 $\pm$ 0.012 |
| Argali Sheep       | 0.871 $\pm$ 0.069 | 0.966 $\pm$ 0.048 | 0.933 $\pm$ 0.095 | N/A               | 0.914 $\pm$ 0.011 |
| Bison              | 0.723 $\pm$ 0.021 | 0.941 $\pm$ 0.028 | 0.804 $\pm$ 0.017 | 0.487 $\pm$ 0.070 | 0.788 $\pm$ 0.015 |
| Buffalo            | 0.834 $\pm$ 0.045 | 0.978 $\pm$ 0.032 | 0.895 $\pm$ 0.040 | 0.141 $\pm$ 0.813 | 0.844 $\pm$ 0.039 |
| Cow                | 0.757 $\pm$ 0.019 | 0.979 $\pm$ 0.015 | 0.824 $\pm$ 0.042 | 0.551 $\pm$ 0.035 | 0.765 $\pm$ 0.020 |
| Sheep              | 0.761 $\pm$ 0.011 | 0.959 $\pm$ 0.015 | 0.833 $\pm$ 0.010 | 0.598 $\pm$ 0.154 | 0.769 $\pm$ 0.008 |
| Dog                | 0.771 $\pm$ 0.013 | 0.962 $\pm$ 0.006 | 0.836 $\pm$ 0.003 | 0.129 $\pm$ 0.803 | 0.772 $\pm$ 0.011 |
| Fox                | 0.780 $\pm$ 0.002 | 0.943 $\pm$ 0.025 | 0.843 $\pm$ 0.014 | N/A               | 0.780 $\pm$ 0.002 |
| Wolf               | 0.778 $\pm$ 0.033 | 0.972 $\pm$ 0.020 | 0.864 $\pm$ 0.061 | N/A               | 0.779 $\pm$ 0.034 |
| Beaver             | 0.562 $\pm$ 0.004 | 0.919 $\pm$ 0.021 | 0.663 $\pm$ 0.015 | 0.867 $\pm$ 0.047 | 0.557 $\pm$ 0.008 |
| Alouatta           | 0.784 $\pm$ 0.038 | 1.000 $\pm$ 0.000 | 0.924 $\pm$ 0.061 | N/A               | 0.784 $\pm$ 0.038 |
| Monkey             | 0.690 $\pm$ 0.027 | 0.961 $\pm$ 0.013 | 0.769 $\pm$ 0.060 | N/A               | 0.690 $\pm$ 0.027 |
| Noisy Night Monkey | 0.765 $\pm$ 0.026 | 0.960 $\pm$ 0.000 | 0.803 $\pm$ 0.068 | N/A               | 0.777 $\pm$ 0.040 |
| Spider Monkey      | 0.602 $\pm$ 0.046 | 0.871 $\pm$ 0.024 | 0.627 $\pm$ 0.072 | 0.300 $\pm$ 0.920 | 0.600 $\pm$ 0.048 |
| Uakari             | 0.829 $\pm$ 0.007 | 1.000 $\pm$ 0.000 | 0.976 $\pm$ 0.034 | N/A               | 0.829 $\pm$ 0.007 |
| Deer               | 0.794 $\pm$ 0.029 | 0.950 $\pm$ 0.014 | 0.847 $\pm$ 0.029 | 0.157 $\pm$ 0.829 | 0.811 $\pm$ 0.006 |
| Moose              | 0.776 $\pm$ 0.014 | 0.973 $\pm$ 0.005 | 0.843 $\pm$ 0.054 | 0.838 $\pm$ 0.044 | 0.773 $\pm$ 0.017 |
| Hamster            | 0.571 $\pm$ 0.064 | 0.864 $\pm$ 0.042 | 0.563 $\pm$ 0.079 | 0.241 $\pm$ 0.175 | 0.603 $\pm$ 0.051 |
| Elephant           | 0.704 $\pm$ 0.040 | 0.918 $\pm$ 0.010 | 0.774 $\pm$ 0.051 | N/A               | 0.703 $\pm$ 0.041 |
| Horse              | 0.749 $\pm$ 0.028 | 0.934 $\pm$ 0.038 | 0.798 $\pm$ 0.036 | N/A               | 0.764 $\pm$ 0.022 |
| Zebra              | 0.755 $\pm$ 0.026 | 0.921 $\pm$ 0.013 | 0.775 $\pm$ 0.041 | N/A               | 0.764 $\pm$ 0.019 |
| Bobcat             | 0.751 $\pm$ 0.055 | 0.976 $\pm$ 0.034 | 0.842 $\pm$ 0.057 | N/A               | 0.753 $\pm$ 0.057 |
| Cat                | 0.672 $\pm$ 0.036 | 0.935 $\pm$ 0.006 | 0.750 $\pm$ 0.067 | N/A               | 0.675 $\pm$ 0.037 |
| Cheetah            | 0.735 $\pm$ 0.029 | 0.936 $\pm$ 0.010 | 0.800 $\pm$ 0.026 | N/A               | 0.769 $\pm$ 0.032 |
| Jaguar             | 0.785 $\pm$ 0.035 | 0.972 $\pm$ 0.020 | 0.864 $\pm$ 0.082 | 0.592 $\pm$ 0.170 | 0.803 $\pm$ 0.024 |
| King Cheetah       | 0.848 $\pm$ 0.122 | 0.944 $\pm$ 0.079 | 0.944 $\pm$ 0.079 | N/A               | 0.848 $\pm$ 0.122 |
| Leopard            | 0.731 $\pm$ 0.009 | 0.956 $\pm$ 0.034 | 0.796 $\pm$ 0.047 | N/A               | 0.731 $\pm$ 0.009 |
| Lion               | 0.726 $\pm$ 0.017 | 0.927 $\pm$ 0.024 | 0.817 $\pm$ 0.038 | N/A               | 0.726 $\pm$ 0.017 |
| Panther            | 0.772 $\pm$ 0.048 | 0.985 $\pm$ 0.021 | 0.851 $\pm$ 0.027 | 0.084 $\pm$ 0.769 | 0.780 $\pm$ 0.051 |
| Snow Leopard       | 0.858 $\pm$ 0.042 | 1.000 $\pm$ 0.000 | 0.939 $\pm$ 0.048 | 0.183 $\pm$ 0.849 | 0.865 $\pm$ 0.035 |
| Tiger              | 0.811 $\pm$ 0.012 | 0.973 $\pm$ 0.021 | 0.872 $\pm$ 0.009 | N/A               | 0.812 $\pm$ 0.013 |
| Giraffe            | 0.803 $\pm$ 0.016 | 0.958 $\pm$ 0.007 | 0.842 $\pm$ 0.046 | N/A               | 0.808 $\pm$ 0.016 |
| Hippo              | 0.457 $\pm$ 0.062 | 0.746 $\pm$ 0.089 | 0.451 $\pm$ 0.064 | 0.627 $\pm$ 0.273 | 0.462 $\pm$ 0.052 |
| Chimpanzee         | 0.642 $\pm$ 0.009 | 0.912 $\pm$ 0.034 | 0.689 $\pm$ 0.044 | 0.567 $\pm$ 0.126 | 0.645 $\pm$ 0.018 |
| Gorilla            | 0.753 $\pm$ 0.010 | 0.950 $\pm$ 0.029 | 0.881 $\pm$ 0.038 | N/A               | 0.753 $\pm$ 0.010 |
| Rabbit             | 0.731 $\pm$ 0.013 | 0.968 $\pm$ 0.003 | 0.821 $\pm$ 0.023 | N/A               | 0.731 $\pm$ 0.013 |
| Skunk              | 0.558 $\pm$ 0.016 | 0.864 $\pm$ 0.035 | 0.652 $\pm$ 0.020 | N/A               | 0.562 $\pm$ 0.018 |
| Mouse              | 0.640 $\pm$ 0.015 | 0.954 $\pm$ 0.033 | 0.717 $\pm$ 0.036 | 0.123 $\pm$ 0.796 | 0.640 $\pm$ 0.013 |
| Rat                | 0.650 $\pm$ 0.031 | 0.929 $\pm$ 0.015 | 0.729 $\pm$ 0.052 | 0.200 $\pm$ 0.849 | 0.652 $\pm$ 0.030 |
| Otter              | 0.559 $\pm$ 0.017 | 0.909 $\pm$ 0.031 | 0.582 $\pm$ 0.050 | N/A               | 0.559 $\pm$ 0.017 |
| Weasel             | 0.716 $\pm$ 0.025 | 0.955 $\pm$ 0.018 | 0.790 $\pm$ 0.016 | N/A               | 0.717 $\pm$ 0.025 |
| Raccoon            | 0.629 $\pm$ 0.032 | 0.954 $\pm$ 0.005 | 0.675 $\pm$ 0.061 | 0.401 $\pm$ 0.143 | 0.651 $\pm$ 0.023 |
| Rhino              | 0.819 $\pm$ 0.021 | 0.980 $\pm$ 0.000 | 0.892 $\pm$ 0.048 | N/A               | 0.819 $\pm$ 0.021 |
| Marmot             | 0.784 $\pm$ 0.032 | 1.000 $\pm$ 0.000 | 0.860 $\pm$ 0.053 | N/A               | 0.784 $\pm$ 0.032 |
| Squirrel           | 0.845 $\pm$ 0.008 | 1.000 $\pm$ 0.000 | 0.943 $\pm$ 0.005 | N/A               | 0.845 $\pm$ 0.008 |
| Pig                | 0.642 $\pm$ 0.033 | 0.964 $\pm$ 0.026 | 0.677 $\pm$ 0.066 | N/A               | 0.640 $\pm$ 0.033 |
| Black Bear         | 0.662 $\pm$ 0.040 | 0.967 $\pm$ 0.047 | 0.865 $\pm$ 0.128 | N/A               | 0.662 $\pm$ 0.040 |
| Brown Bear         | 0.617 $\pm$ 0.029 | 0.940 $\pm$ 0.011 | 0.660 $\pm$ 0.051 | 0.067 $\pm$ 0.759 | 0.620 $\pm$ 0.026 |
| Panda              | 0.583 $\pm$ 0.008 | 0.912 $\pm$ 0.020 | 0.607 $\pm$ 0.082 | N/A               | 0.583 $\pm$ 0.009 |
| Polar Bear         | 0.631 $\pm$ 0.016 | 0.948 $\pm$ 0.054 | 0.659 $\pm$ 0.056 | N/A               | 0.631 $\pm$ 0.016 |

Table S3: Per-species results of HRNet-w32 [13] on the test set the SL Track at the setting of training from scratch.

| species            | AP                | AP.5              | AP.75             | AP(M)             | AP(L)             |
|--------------------|-------------------|-------------------|-------------------|-------------------|-------------------|
| Antelope           | 0.835 $\pm$ 0.019 | 0.955 $\pm$ 0.021 | 0.911 $\pm$ 0.021 | 0.706 $\pm$ 0.026 | 0.851 $\pm$ 0.020 |
| Argali Sheep       | 0.858 $\pm$ 0.065 | 0.966 $\pm$ 0.048 | 0.932 $\pm$ 0.097 | N/A               | 0.904 $\pm$ 0.005 |
| Bison              | 0.705 $\pm$ 0.026 | 0.917 $\pm$ 0.036 | 0.773 $\pm$ 0.020 | 0.484 $\pm$ 0.115 | 0.769 $\pm$ 0.014 |
| Buffalo            | 0.810 $\pm$ 0.044 | 0.973 $\pm$ 0.039 | 0.870 $\pm$ 0.060 | 0.136 $\pm$ 0.806 | 0.818 $\pm$ 0.043 |
| Cow                | 0.733 $\pm$ 0.018 | 0.962 $\pm$ 0.017 | 0.810 $\pm$ 0.009 | 0.571 $\pm$ 0.091 | 0.742 $\pm$ 0.018 |
| Sheep              | 0.741 $\pm$ 0.011 | 0.950 $\pm$ 0.020 | 0.797 $\pm$ 0.013 | 0.593 $\pm$ 0.122 | 0.748 $\pm$ 0.014 |
| Dog                | 0.743 $\pm$ 0.016 | 0.960 $\pm$ 0.014 | 0.807 $\pm$ 0.011 | 0.100 $\pm$ 0.787 | 0.745 $\pm$ 0.013 |
| Fox                | 0.753 $\pm$ 0.028 | 0.917 $\pm$ 0.022 | 0.792 $\pm$ 0.036 | N/A               | 0.753 $\pm$ 0.028 |
| Wolf               | 0.756 $\pm$ 0.030 | 0.966 $\pm$ 0.025 | 0.771 $\pm$ 0.053 | N/A               | 0.756 $\pm$ 0.030 |
| Beaver             | 0.483 $\pm$ 0.026 | 0.848 $\pm$ 0.024 | 0.465 $\pm$ 0.111 | 0.384 $\pm$ 0.327 | 0.490 $\pm$ 0.029 |
| Alouatta           | 0.745 $\pm$ 0.074 | 0.970 $\pm$ 0.042 | 0.896 $\pm$ 0.097 | N/A               | 0.745 $\pm$ 0.074 |
| Monkey             | 0.621 $\pm$ 0.025 | 0.906 $\pm$ 0.030 | 0.655 $\pm$ 0.056 | N/A               | 0.623 $\pm$ 0.027 |
| Noisy Night Monkey | 0.722 $\pm$ 0.031 | 0.935 $\pm$ 0.034 | 0.764 $\pm$ 0.046 | N/A               | 0.721 $\pm$ 0.030 |
| Spider Monkey      | 0.514 $\pm$ 0.043 | 0.824 $\pm$ 0.062 | 0.513 $\pm$ 0.054 | 0.300 $\pm$ 0.920 | 0.513 $\pm$ 0.045 |
| Uakari             | 0.750 $\pm$ 0.004 | 1.000 $\pm$ 0.000 | 0.886 $\pm$ 0.029 | N/A               | 0.750 $\pm$ 0.004 |
| Deer               | 0.805 $\pm$ 0.032 | 0.967 $\pm$ 0.034 | 0.856 $\pm$ 0.022 | 0.134 $\pm$ 0.806 | 0.822 $\pm$ 0.011 |
| Moose              | 0.741 $\pm$ 0.007 | 0.939 $\pm$ 0.03  | 0.815 $\pm$ 0.011 | 0.776 $\pm$ 0.055 | 0.739 $\pm$ 0.011 |
| Hamster            | 0.543 $\pm$ 0.031 | 0.833 $\pm$ 0.054 | 0.553 $\pm$ 0.017 | 0.209 $\pm$ 0.086 | 0.574 $\pm$ 0.019 |
| Elephant           | 0.664 $\pm$ 0.035 | 0.881 $\pm$ 0.051 | 0.725 $\pm$ 0.064 | N/A               | 0.662 $\pm$ 0.037 |
| Horse              | 0.759 $\pm$ 0.033 | 0.928 $\pm$ 0.043 | 0.802 $\pm$ 0.025 | 0.023 $\pm$ 0.731 | 0.765 $\pm$ 0.033 |
| Zebra              | 0.727 $\pm$ 0.025 | 0.886 $\pm$ 0.014 | 0.741 $\pm$ 0.027 | N/A               | 0.736 $\pm$ 0.018 |
| Bobcat             | 0.746 $\pm$ 0.044 | 0.983 $\pm$ 0.024 | 0.812 $\pm$ 0.058 | N/A               | 0.746 $\pm$ 0.044 |
| Cat                | 0.638 $\pm$ 0.030 | 0.926 $\pm$ 0.023 | 0.693 $\pm$ 0.053 | N/A               | 0.639 $\pm$ 0.031 |
| Cheetah            | 0.707 $\pm$ 0.043 | 0.923 $\pm$ 0.018 | 0.762 $\pm$ 0.074 | N/A               | 0.739 $\pm$ 0.038 |
| Jaguar             | 0.764 $\pm$ 0.038 | 0.959 $\pm$ 0.032 | 0.834 $\pm$ 0.039 | 0.662 $\pm$ 0.225 | 0.775 $\pm$ 0.027 |
| King Cheetah       | 0.813 $\pm$ 0.074 | 0.944 $\pm$ 0.079 | 0.944 $\pm$ 0.079 | N/A               | 0.813 $\pm$ 0.074 |
| Leopard            | 0.722 $\pm$ 0.026 | 0.932 $\pm$ 0.020 | 0.787 $\pm$ 0.024 | N/A               | 0.722 $\pm$ 0.026 |
| Lion               | 0.689 $\pm$ 0.012 | 0.916 $\pm$ 0.018 | 0.738 $\pm$ 0.017 | N/A               | 0.689 $\pm$ 0.012 |
| Panther            | 0.760 $\pm$ 0.024 | 0.984 $\pm$ 0.023 | 0.815 $\pm$ 0.024 | 0.167 $\pm$ 0.829 | 0.764 $\pm$ 0.025 |
| Snow Leopard       | 0.839 $\pm$ 0.036 | 0.980 $\pm$ 0.028 | 0.889 $\pm$ 0.005 | 0.183 $\pm$ 0.849 | 0.844 $\pm$ 0.030 |
| Tiger              | 0.764 $\pm$ 0.018 | 0.971 $\pm$ 0.024 | 0.828 $\pm$ 0.026 | N/A               | 0.764 $\pm$ 0.018 |
| Giraffe            | 0.784 $\pm$ 0.009 | 0.942 $\pm$ 0.020 | 0.819 $\pm$ 0.016 | N/A               | 0.789 $\pm$ 0.013 |
| Hippo              | 0.402 $\pm$ 0.026 | 0.685 $\pm$ 0.030 | 0.410 $\pm$ 0.016 | 0.705 $\pm$ 0.206 | 0.396 $\pm$ 0.023 |
| Chimpanzee         | 0.619 $\pm$ 0.031 | 0.900 $\pm$ 0.049 | 0.707 $\pm$ 0.026 | 0.537 $\pm$ 0.140 | 0.619 $\pm$ 0.042 |
| Gorilla            | 0.736 $\pm$ 0.026 | 0.943 $\pm$ 0.038 | 0.875 $\pm$ 0.077 | N/A               | 0.736 $\pm$ 0.026 |
| Rabbit             | 0.711 $\pm$ 0.045 | 0.960 $\pm$ 0.008 | 0.799 $\pm$ 0.072 | N/A               | 0.711 $\pm$ 0.045 |
| Skunk              | 0.499 $\pm$ 0.039 | 0.830 $\pm$ 0.079 | 0.514 $\pm$ 0.054 | N/A               | 0.504 $\pm$ 0.041 |
| Mouse              | 0.603 $\pm$ 0.035 | 0.904 $\pm$ 0.011 | 0.675 $\pm$ 0.032 | 0.085 $\pm$ 0.768 | 0.608 $\pm$ 0.036 |
| Rat                | 0.580 $\pm$ 0.043 | 0.936 $\pm$ 0.048 | 0.643 $\pm$ 0.059 | 0.100 $\pm$ 0.787 | 0.581 $\pm$ 0.046 |
| Otter              | 0.537 $\pm$ 0.017 | 0.868 $\pm$ 0.021 | 0.538 $\pm$ 0.018 | N/A               | 0.538 $\pm$ 0.017 |
| Weasel             | 0.649 $\pm$ 0.041 | 0.945 $\pm$ 0.026 | 0.691 $\pm$ 0.075 | N/A               | 0.649 $\pm$ 0.041 |
| Raccoon            | 0.585 $\pm$ 0.028 | 0.940 $\pm$ 0.009 | 0.590 $\pm$ 0.113 | 0.363 $\pm$ 0.124 | 0.601 $\pm$ 0.026 |
| Rhino              | 0.762 $\pm$ 0.048 | 0.950 $\pm$ 0.021 | 0.824 $\pm$ 0.067 | N/A               | 0.762 $\pm$ 0.048 |
| Marmot             | 0.768 $\pm$ 0.043 | 1.000 $\pm$ 0.000 | 0.843 $\pm$ 0.099 | N/A               | 0.768 $\pm$ 0.043 |
| Squirrel           | 0.849 $\pm$ 0.022 | 1.000 $\pm$ 0.000 | 0.962 $\pm$ 0.027 | N/A               | 0.849 $\pm$ 0.022 |
| Pig                | 0.612 $\pm$ 0.045 | 0.907 $\pm$ 0.049 | 0.648 $\pm$ 0.057 | N/A               | 0.610 $\pm$ 0.045 |
| Black Bear         | 0.684 $\pm$ 0.034 | 0.967 $\pm$ 0.047 | 0.861 $\pm$ 0.133 | N/A               | 0.684 $\pm$ 0.034 |
| Brown Bear         | 0.584 $\pm$ 0.025 | 0.960 $\pm$ 0.014 | 0.608 $\pm$ 0.067 | 0.167 $\pm$ 0.834 | 0.583 $\pm$ 0.023 |
| Panda              | 0.514 $\pm$ 0.056 | 0.908 $\pm$ 0.034 | 0.557 $\pm$ 0.099 | N/A               | 0.513 $\pm$ 0.056 |
| Polar Bear         | 0.619 $\pm$ 0.016 | 0.928 $\pm$ 0.028 | 0.650 $\pm$ 0.021 | N/A               | 0.619 $\pm$ 0.016 |

Table S4: Per-species results of HRNet-w32 [13] on the **56 animals** test set the SL Track at the setting of pretraining on ImageNet.

| species            | AP                | AP <sub>.5</sub>  | AP <sub>.75</sub> | AP <sub>M</sub>   | AP <sub>L</sub>   |
|--------------------|-------------------|-------------------|-------------------|-------------------|-------------------|
| Antelope           | 0.856 $\pm$ 0.017 | 0.965 $\pm$ 0.011 | 0.920 $\pm$ 0.019 | 0.739 $\pm$ 0.016 | 0.869 $\pm$ 0.014 |
| Argali Sheep       | 0.868 $\pm$ 0.061 | 0.987 $\pm$ 0.019 | 0.934 $\pm$ 0.093 | N/A               | 0.917 $\pm$ 0.012 |
| Bison              | 0.713 $\pm$ 0.020 | 0.945 $\pm$ 0.016 | 0.783 $\pm$ 0.023 | 0.501 $\pm$ 0.111 | 0.769 $\pm$ 0.008 |
| Buffalo            | 0.825 $\pm$ 0.050 | 0.973 $\pm$ 0.026 | 0.899 $\pm$ 0.049 | 0.113 $\pm$ 0.796 | 0.837 $\pm$ 0.043 |
| Cow                | 0.764 $\pm$ 0.023 | 0.993 $\pm$ 0.009 | 0.828 $\pm$ 0.047 | 0.663 $\pm$ 0.052 | 0.770 $\pm$ 0.025 |
| Sheep              | 0.749 $\pm$ 0.014 | 0.950 $\pm$ 0.022 | 0.834 $\pm$ 0.025 | 0.591 $\pm$ 0.214 | 0.754 $\pm$ 0.015 |
| Chihuahua          | 0.760 $\pm$ 0.021 | 0.982 $\pm$ 0.025 | 0.851 $\pm$ 0.042 | N/A               | 0.760 $\pm$ 0.021 |
| Collie             | 0.775 $\pm$ 0.026 | 0.973 $\pm$ 0.021 | 0.877 $\pm$ 0.053 | N/A               | 0.775 $\pm$ 0.026 |
| Dalmatian          | 0.759 $\pm$ 0.038 | 0.960 $\pm$ 0.030 | 0.776 $\pm$ 0.050 | N/A               | 0.759 $\pm$ 0.038 |
| Dog                | 0.801 $\pm$ 0.020 | 0.980 $\pm$ 0.014 | 0.857 $\pm$ 0.040 | 0.082 $\pm$ 0.765 | 0.809 $\pm$ 0.013 |
| Fox                | 0.776 $\pm$ 0.009 | 0.943 $\pm$ 0.009 | 0.850 $\pm$ 0.030 | N/A               | 0.776 $\pm$ 0.009 |
| German Shepherd    | 0.777 $\pm$ 0.045 | 0.958 $\pm$ 0.011 | 0.864 $\pm$ 0.063 | N/A               | 0.777 $\pm$ 0.045 |
| Wolf               | 0.776 $\pm$ 0.025 | 0.973 $\pm$ 0.019 | 0.873 $\pm$ 0.028 | N/A               | 0.776 $\pm$ 0.025 |
| Beaver             | 0.564 $\pm$ 0.046 | 0.868 $\pm$ 0.047 | 0.623 $\pm$ 0.128 | 0.585 $\pm$ 0.300 | 0.565 $\pm$ 0.045 |
| Alouatta           | 0.764 $\pm$ 0.034 | 1.000 $\pm$ 0.000 | 0.922 $\pm$ 0.061 | N/A               | 0.764 $\pm$ 0.034 |
| Monkey             | 0.671 $\pm$ 0.034 | 0.927 $\pm$ 0.024 | 0.750 $\pm$ 0.074 | N/A               | 0.671 $\pm$ 0.034 |
| Noisy Night Monkey | 0.755 $\pm$ 0.049 | 0.973 $\pm$ 0.019 | 0.847 $\pm$ 0.081 | N/A               | 0.759 $\pm$ 0.055 |
| Spider Monkey      | 0.573 $\pm$ 0.044 | 0.871 $\pm$ 0.036 | 0.620 $\pm$ 0.059 | 0.267 $\pm$ 0.899 | 0.571 $\pm$ 0.045 |
| Uakari             | 0.809 $\pm$ 0.026 | 1.000 $\pm$ 0.000 | 1.000 $\pm$ 0.000 | N/A               | 0.809 $\pm$ 0.026 |
| Deer               | 0.798 $\pm$ 0.019 | 0.963 $\pm$ 0.024 | 0.848 $\pm$ 0.022 | 0.133 $\pm$ 0.805 | 0.815 $\pm$ 0.006 |
| Moose              | 0.764 $\pm$ 0.015 | 0.982 $\pm$ 0.013 | 0.823 $\pm$ 0.025 | 0.845 $\pm$ 0.103 | 0.758 $\pm$ 0.014 |
| Hamster            | 0.595 $\pm$ 0.036 | 0.875 $\pm$ 0.044 | 0.628 $\pm$ 0.078 | 0.288 $\pm$ 0.133 | 0.626 $\pm$ 0.040 |
| Elephant           | 0.710 $\pm$ 0.030 | 0.913 $\pm$ 0.048 | 0.800 $\pm$ 0.049 | N/A               | 0.709 $\pm$ 0.031 |
| Horse              | 0.770 $\pm$ 0.043 | 0.941 $\pm$ 0.031 | 0.826 $\pm$ 0.069 | 0.068 $\pm$ 0.758 | 0.779 $\pm$ 0.038 |
| Zebra              | 0.748 $\pm$ 0.024 | 0.910 $\pm$ 0.017 | 0.760 $\pm$ 0.054 | N/A               | 0.761 $\pm$ 0.016 |
| Bobcat             | 0.765 $\pm$ 0.043 | 0.983 $\pm$ 0.024 | 0.845 $\pm$ 0.022 | N/A               | 0.768 $\pm$ 0.046 |
| Cat                | 0.697 $\pm$ 0.052 | 0.962 $\pm$ 0.008 | 0.807 $\pm$ 0.086 | N/A               | 0.697 $\pm$ 0.052 |
| Cheetah            | 0.756 $\pm$ 0.047 | 0.942 $\pm$ 0.011 | 0.821 $\pm$ 0.093 | N/A               | 0.785 $\pm$ 0.036 |
| Jaguar             | 0.793 $\pm$ 0.041 | 0.984 $\pm$ 0.011 | 0.866 $\pm$ 0.080 | 0.638 $\pm$ 0.195 | 0.809 $\pm$ 0.029 |
| King Cheethah      | 0.854 $\pm$ 0.085 | 0.944 $\pm$ 0.079 | 0.944 $\pm$ 0.079 | N/A               | 0.854 $\pm$ 0.085 |
| Leopard            | 0.760 $\pm$ 0.005 | 0.983 $\pm$ 0.024 | 0.850 $\pm$ 0.017 | N/A               | 0.760 $\pm$ 0.005 |
| Lion               | 0.716 $\pm$ 0.022 | 0.922 $\pm$ 0.008 | 0.787 $\pm$ 0.016 | N/A               | 0.716 $\pm$ 0.022 |
| Panther            | 0.794 $\pm$ 0.037 | 0.983 $\pm$ 0.024 | 0.914 $\pm$ 0.037 | 0.184 $\pm$ 0.837 | 0.796 $\pm$ 0.038 |
| Persian Cat        | 0.592 $\pm$ 0.036 | 0.930 $\pm$ 0.016 | 0.640 $\pm$ 0.079 | N/A               | 0.592 $\pm$ 0.036 |
| Siamese Cat        | 0.710 $\pm$ 0.053 | 0.952 $\pm$ 0.037 | 0.804 $\pm$ 0.054 | N/A               | 0.710 $\pm$ 0.053 |
| Snow Leopard       | 0.860 $\pm$ 0.038 | 1.000 $\pm$ 0.000 | 0.980 $\pm$ 0.029 | 0.217 $\pm$ 0.866 | 0.866 $\pm$ 0.035 |
| Tiger              | 0.810 $\pm$ 0.014 | 0.979 $\pm$ 0.015 | 0.858 $\pm$ 0.019 | N/A               | 0.810 $\pm$ 0.014 |
| Giraffe            | 0.799 $\pm$ 0.025 | 0.949 $\pm$ 0.021 | 0.840 $\pm$ 0.044 | N/A               | 0.805 $\pm$ 0.020 |
| Hippo              | 0.471 $\pm$ 0.077 | 0.778 $\pm$ 0.082 | 0.484 $\pm$ 0.056 | 0.640 $\pm$ 0.283 | 0.476 $\pm$ 0.077 |
| Chimpanzee         | 0.659 $\pm$ 0.027 | 0.912 $\pm$ 0.034 | 0.692 $\pm$ 0.021 | 0.624 $\pm$ 0.057 | 0.661 $\pm$ 0.035 |
| Gorilla            | 0.754 $\pm$ 0.014 | 0.952 $\pm$ 0.037 | 0.877 $\pm$ 0.013 | N/A               | 0.754 $\pm$ 0.014 |
| Rabbit             | 0.729 $\pm$ 0.006 | 0.990 $\pm$ 0.014 | 0.830 $\pm$ 0.044 | N/A               | 0.729 $\pm$ 0.006 |
| Skunk              | 0.576 $\pm$ 0.033 | 0.874 $\pm$ 0.044 | 0.651 $\pm$ 0.046 | N/A               | 0.580 $\pm$ 0.035 |
| Mouse              | 0.641 $\pm$ 0.017 | 0.954 $\pm$ 0.033 | 0.716 $\pm$ 0.039 | 0.100 $\pm$ 0.778 | 0.644 $\pm$ 0.018 |
| Rat                | 0.647 $\pm$ 0.040 | 0.930 $\pm$ 0.044 | 0.747 $\pm$ 0.040 | 0.133 $\pm$ 0.818 | 0.647 $\pm$ 0.044 |
| Otter              | 0.567 $\pm$ 0.012 | 0.897 $\pm$ 0.020 | 0.594 $\pm$ 0.017 | N/A               | 0.567 $\pm$ 0.012 |
| Weasel             | 0.694 $\pm$ 0.033 | 0.935 $\pm$ 0.017 | 0.781 $\pm$ 0.040 | N/A               | 0.694 $\pm$ 0.033 |
| Raccoon            | 0.649 $\pm$ 0.041 | 0.972 $\pm$ 0.021 | 0.759 $\pm$ 0.035 | 0.433 $\pm$ 0.128 | 0.673 $\pm$ 0.035 |
| Rhino              | 0.800 $\pm$ 0.011 | 0.980 $\pm$ 0.000 | 0.864 $\pm$ 0.031 | N/A               | 0.800 $\pm$ 0.011 |
| Marmot             | 0.792 $\pm$ 0.046 | 0.967 $\pm$ 0.047 | 0.917 $\pm$ 0.072 | N/A               | 0.792 $\pm$ 0.046 |
| Squirrel           | 0.863 $\pm$ 0.008 | 1.000 $\pm$ 0.000 | 0.953 $\pm$ 0.013 | N/A               | 0.863 $\pm$ 0.008 |
| Pig                | 0.645 $\pm$ 0.040 | 0.928 $\pm$ 0.050 | 0.706 $\pm$ 0.039 | N/A               | 0.644 $\pm$ 0.040 |
| Black Bear         | 0.685 $\pm$ 0.035 | 1.000 $\pm$ 0.000 | 0.853 $\pm$ 0.144 | N/A               | 0.685 $\pm$ 0.035 |
| Brown Bear         | 0.612 $\pm$ 0.010 | 0.960 $\pm$ 0.014 | 0.680 $\pm$ 0.042 | 0.068 $\pm$ 0.755 | 0.615 $\pm$ 0.008 |
| Panda              | 0.572 $\pm$ 0.028 | 0.935 $\pm$ 0.006 | 0.604 $\pm$ 0.091 | N/A               | 0.571 $\pm$ 0.029 |
| Polar Bear         | 0.623 $\pm$ 0.001 | 0.931 $\pm$ 0.053 | 0.654 $\pm$ 0.015 | N/A               | 0.623 $\pm$ 0.001 |



Table S5: Per-species results of HRNet-w32 [13] on the **56 animals** test set the SL Track at the setting of training from scratch.

| species            | AP                | AP <sub>.5</sub>  | AP <sub>.75</sub> | AP <sub>M</sub>   | AP <sub>L</sub>   |
|--------------------|-------------------|-------------------|-------------------|-------------------|-------------------|
| Antelope           | 0.834 $\pm$ 0.019 | 0.964 $\pm$ 0.011 | 0.910 $\pm$ 0.013 | 0.694 $\pm$ 0.026 | 0.854 $\pm$ 0.017 |
| Argali Sheep       | 0.856 $\pm$ 0.087 | 0.957 $\pm$ 0.061 | 0.932 $\pm$ 0.096 | N/A               | 0.909 $\pm$ 0.014 |
| Bison              | 0.700 $\pm$ 0.041 | 0.925 $\pm$ 0.033 | 0.778 $\pm$ 0.034 | 0.524 $\pm$ 0.138 | 0.754 $\pm$ 0.025 |
| Buffalo            | 0.807 $\pm$ 0.038 | 0.976 $\pm$ 0.033 | 0.876 $\pm$ 0.051 | 0.091 $\pm$ 0.779 | 0.820 $\pm$ 0.033 |
| Cow                | 0.756 $\pm$ 0.013 | 0.980 $\pm$ 0.014 | 0.838 $\pm$ 0.018 | 0.644 $\pm$ 0.080 | 0.762 $\pm$ 0.013 |
| Sheep              | 0.749 $\pm$ 0.013 | 0.958 $\pm$ 0.024 | 0.831 $\pm$ 0.019 | 0.616 $\pm$ 0.160 | 0.755 $\pm$ 0.013 |
| Chihuahua          | 0.716 $\pm$ 0.029 | 0.949 $\pm$ 0.002 | 0.776 $\pm$ 0.071 | N/A               | 0.718 $\pm$ 0.026 |
| Collie             | 0.763 $\pm$ 0.010 | 0.983 $\pm$ 0.012 | 0.840 $\pm$ 0.035 | N/A               | 0.763 $\pm$ 0.010 |
| Dalmatian          | 0.723 $\pm$ 0.041 | 0.916 $\pm$ 0.025 | 0.731 $\pm$ 0.055 | N/A               | 0.723 $\pm$ 0.041 |
| Dog                | 0.782 $\pm$ 0.016 | 0.964 $\pm$ 0.014 | 0.850 $\pm$ 0.013 | 0.149 $\pm$ 0.825 | 0.791 $\pm$ 0.019 |
| Fox                | 0.738 $\pm$ 0.017 | 0.939 $\pm$ 0.008 | 0.803 $\pm$ 0.049 | N/A               | 0.738 $\pm$ 0.017 |
| German Shepherd    | 0.733 $\pm$ 0.041 | 0.945 $\pm$ 0.005 | 0.840 $\pm$ 0.061 | N/A               | 0.734 $\pm$ 0.040 |
| Wolf               | 0.751 $\pm$ 0.040 | 0.971 $\pm$ 0.020 | 0.794 $\pm$ 0.070 | N/A               | 0.751 $\pm$ 0.040 |
| Beaver             | 0.529 $\pm$ 0.034 | 0.879 $\pm$ 0.023 | 0.557 $\pm$ 0.087 | 0.584 $\pm$ 0.245 | 0.528 $\pm$ 0.033 |
| Alouatta           | 0.725 $\pm$ 0.045 | 1.000 $\pm$ 0.000 | 0.876 $\pm$ 0.120 | N/A               | 0.725 $\pm$ 0.045 |
| Monkey             | 0.629 $\pm$ 0.052 | 0.930 $\pm$ 0.023 | 0.686 $\pm$ 0.082 | N/A               | 0.629 $\pm$ 0.052 |
| Noisy Night Monkey | 0.721 $\pm$ 0.004 | 0.958 $\pm$ 0.001 | 0.758 $\pm$ 0.040 | N/A               | 0.725 $\pm$ 0.010 |
| Spider Monkey      | 0.535 $\pm$ 0.029 | 0.830 $\pm$ 0.048 | 0.588 $\pm$ 0.033 | 0.233 $\pm$ 0.873 | 0.533 $\pm$ 0.031 |
| Uakari             | 0.763 $\pm$ 0.028 | 1.000 $\pm$ 0.000 | 0.921 $\pm$ 0.017 | N/A               | 0.763 $\pm$ 0.028 |
| Deer               | 0.792 $\pm$ 0.031 | 0.960 $\pm$ 0.029 | 0.836 $\pm$ 0.037 | 0.130 $\pm$ 0.804 | 0.808 $\pm$ 0.011 |
| Moose              | 0.759 $\pm$ 0.017 | 0.959 $\pm$ 0.008 | 0.844 $\pm$ 0.019 | 0.691 $\pm$ 0.136 | 0.761 $\pm$ 0.019 |
| Hamster            | 0.520 $\pm$ 0.043 | 0.829 $\pm$ 0.079 | 0.535 $\pm$ 0.035 | 0.276 $\pm$ 0.138 | 0.553 $\pm$ 0.024 |
| Elephant           | 0.672 $\pm$ 0.038 | 0.883 $\pm$ 0.031 | 0.772 $\pm$ 0.051 | N/A               | 0.671 $\pm$ 0.040 |
| Horse              | 0.757 $\pm$ 0.015 | 0.935 $\pm$ 0.022 | 0.785 $\pm$ 0.008 | N/A               | 0.768 $\pm$ 0.012 |
| Zebra              | 0.725 $\pm$ 0.024 | 0.872 $\pm$ 0.024 | 0.752 $\pm$ 0.038 | N/A               | 0.733 $\pm$ 0.020 |
| Bobcat             | 0.727 $\pm$ 0.054 | 0.973 $\pm$ 0.021 | 0.793 $\pm$ 0.088 | N/A               | 0.727 $\pm$ 0.054 |
| Cat                | 0.667 $\pm$ 0.040 | 0.943 $\pm$ 0.006 | 0.755 $\pm$ 0.040 | N/A               | 0.672 $\pm$ 0.041 |
| Cheetah            | 0.718 $\pm$ 0.020 | 0.956 $\pm$ 0.010 | 0.751 $\pm$ 0.083 | N/A               | 0.742 $\pm$ 0.031 |
| Jaguar             | 0.748 $\pm$ 0.016 | 0.971 $\pm$ 0.021 | 0.843 $\pm$ 0.021 | 0.649 $\pm$ 0.230 | 0.764 $\pm$ 0.013 |
| King Cheetah       | 0.798 $\pm$ 0.079 | 0.944 $\pm$ 0.079 | 0.832 $\pm$ 0.138 | N/A               | 0.798 $\pm$ 0.079 |
| Leopard            | 0.705 $\pm$ 0.004 | 0.938 $\pm$ 0.030 | 0.782 $\pm$ 0.062 | N/A               | 0.705 $\pm$ 0.004 |
| Lion               | 0.685 $\pm$ 0.026 | 0.915 $\pm$ 0.019 | 0.714 $\pm$ 0.046 | N/A               | 0.685 $\pm$ 0.026 |
| Panther            | 0.748 $\pm$ 0.041 | 0.983 $\pm$ 0.024 | 0.798 $\pm$ 0.044 | 0.217 $\pm$ 0.863 | 0.748 $\pm$ 0.040 |
| Persian Cat        | 0.559 $\pm$ 0.046 | 0.858 $\pm$ 0.015 | 0.535 $\pm$ 0.070 | N/A               | 0.559 $\pm$ 0.046 |
| Siamese Cat        | 0.677 $\pm$ 0.038 | 0.965 $\pm$ 0.025 | 0.713 $\pm$ 0.063 | N/A               | 0.677 $\pm$ 0.038 |
| Snow Leopard       | 0.826 $\pm$ 0.058 | 1.000 $\pm$ 0.000 | 0.866 $\pm$ 0.077 | 0.167 $\pm$ 0.850 | 0.831 $\pm$ 0.048 |
| Tiger              | 0.764 $\pm$ 0.021 | 0.962 $\pm$ 0.034 | 0.820 $\pm$ 0.008 | N/A               | 0.764 $\pm$ 0.021 |
| Giraffe            | 0.783 $\pm$ 0.015 | 0.949 $\pm$ 0.015 | 0.815 $\pm$ 0.027 | N/A               | 0.790 $\pm$ 0.012 |
| Hippo              | 0.383 $\pm$ 0.062 | 0.659 $\pm$ 0.070 | 0.383 $\pm$ 0.058 | 0.615 $\pm$ 0.245 | 0.384 $\pm$ 0.057 |
| Chimpanzee         | 0.625 $\pm$ 0.031 | 0.944 $\pm$ 0.026 | 0.709 $\pm$ 0.051 | 0.547 $\pm$ 0.114 | 0.629 $\pm$ 0.038 |
| Gorilla            | 0.736 $\pm$ 0.029 | 0.942 $\pm$ 0.036 | 0.836 $\pm$ 0.058 | N/A               | 0.736 $\pm$ 0.029 |
| Rabbit             | 0.712 $\pm$ 0.032 | 0.979 $\pm$ 0.015 | 0.791 $\pm$ 0.031 | N/A               | 0.712 $\pm$ 0.032 |
| Skunk              | 0.514 $\pm$ 0.032 | 0.832 $\pm$ 0.013 | 0.566 $\pm$ 0.089 | N/A               | 0.518 $\pm$ 0.032 |
| Mouse              | 0.608 $\pm$ 0.032 | 0.928 $\pm$ 0.030 | 0.657 $\pm$ 0.090 | 0.124 $\pm$ 0.795 | 0.607 $\pm$ 0.032 |
| Rat                | 0.588 $\pm$ 0.079 | 0.935 $\pm$ 0.058 | 0.623 $\pm$ 0.128 | 0.133 $\pm$ 0.806 | 0.586 $\pm$ 0.083 |
| Otter              | 0.537 $\pm$ 0.021 | 0.889 $\pm$ 0.037 | 0.516 $\pm$ 0.048 | N/A               | 0.537 $\pm$ 0.021 |
| Weasel             | 0.654 $\pm$ 0.027 | 0.917 $\pm$ 0.012 | 0.715 $\pm$ 0.019 | N/A               | 0.656 $\pm$ 0.028 |
| Raccoon            | 0.596 $\pm$ 0.014 | 0.935 $\pm$ 0.017 | 0.588 $\pm$ 0.063 | 0.452 $\pm$ 0.178 | 0.612 $\pm$ 0.010 |
| Rhino              | 0.773 $\pm$ 0.043 | 0.945 $\pm$ 0.033 | 0.854 $\pm$ 0.076 | N/A               | 0.773 $\pm$ 0.043 |
| Marmot             | 0.770 $\pm$ 0.037 | 1.000 $\pm$ 0.000 | 0.836 $\pm$ 0.064 | N/A               | 0.770 $\pm$ 0.037 |
| Squirrel           | 0.840 $\pm$ 0.019 | 1.000 $\pm$ 0.000 | 0.951 $\pm$ 0.037 | N/A               | 0.840 $\pm$ 0.019 |
| Pig                | 0.616 $\pm$ 0.060 | 0.902 $\pm$ 0.062 | 0.712 $\pm$ 0.095 | N/A               | 0.615 $\pm$ 0.059 |
| Black Bear         | 0.682 $\pm$ 0.066 | 0.967 $\pm$ 0.047 | 0.807 $\pm$ 0.099 | N/A               | 0.686 $\pm$ 0.061 |
| Brown Bear         | 0.589 $\pm$ 0.022 | 0.973 $\pm$ 0.005 | 0.621 $\pm$ 0.050 | 0.101 $\pm$ 0.779 | 0.589 $\pm$ 0.022 |
| Panda              | 0.525 $\pm$ 0.033 | 0.921 $\pm$ 0.024 | 0.498 $\pm$ 0.081 | N/A               | 0.524 $\pm$ 0.033 |
| Polar Bear         | 0.599 $\pm$ 0.022 | 0.912 $\pm$ 0.037 | 0.639 $\pm$ 0.015 | N/A               | 0.599 $\pm$ 0.022 |

## 21 A.2 Motivation

22 **1. For what purpose was the dataset created? Was there a specific task in mind? Was there a**  
23 **specific gap that needed to be filled? Please provide a description.**

24 **A1:** AP-10K is created to facilitate research in the area of animal pose estimation. It is important  
25 to study several challenging questions in the context of more training data from diverse species are  
26 available, such as 1) how about the performance of different representative human pose models on  
27 the animal pose estimation task? 2) will the representation ability of a deep model benefit from  
28 training on a large-scale dataset with diverse species? 3) how about the impact of pretraining, *e.g.*,  
29 on the ImageNet dataset [5] or human pose estimation dataset [9], in the context of the large-scale of  
30 dataset with diverse species? and 4) how about the intra- and inter-family generalization ability of  
31 a model trained using data from specific species or family? However, previous datasets for animal  
32 pose estimation contain limited number of animal species. Therefore, it is impossible to study these  
33 questions using existing datasets as they contains at most 5 species, which is far from enough to get  
34 sound conclusion. By contrast, AP-10K has 23 family and 54 species and thus can help researchers  
35 to study these questions.

36 **2. Who created this dataset (e.g., which team, research group) and on behalf of which entity**  
37 **(e.g., company, institution, organization)?**

38 **A2:** AP-10K is created by the authors as well as some volunteer graduate students from Xidian  
39 University, including Jiarui Fan, Ziming Bai, Jinglong Zhao, Yan Liu, Yi Liu, Jiaming Li, Hanbo  
40 Sun, Chong Guo, Junwei Duan, and Xinyu Wang.

41 **3. Who funded the creation of the dataset? If there is an associated grant, please provide the**  
42 **name of the grantor and the grant name and number.**

43 **A3:** The creation of the dataset is founded by the Innovation Capability Support Program of Shaanxi  
44 under the grant of Program No.2021TD-05 and the National Natural Science Foundation of China  
45 under the grant of No.62133012, No.61936006.

## 46 A.3 Composition

47 **1. What do the instances that comprise the dataset represent (e.g., documents, photos, people,**  
48 **countries)? Are there multiple types of instances(e.g., movies, users, and ratings; people and**  
49 **interactions between them; nodes and edges)? Please provide a description.**

50 **A1:** AP-10K is comprised of images covering 54 animal species, which are categorized following  
51 the taxonomic rank, *i.e.*, family and species. For each animal instance, its 17 keypoint annotations  
52 are provided, including Left Eye, Right Eye, Nose, Neck, Root of Tail, Left Shoulder, Left Elbow,  
53 Left Front Paw, Right Shoulder, Right Elbow, Right Front Paw, Left Hip, Left Knee, Left Back Paw,  
54 Right Hip, Right Knee, Right Back Paw.

55 **2. How many instances are there in total (of each type, if appropriate)?**

56 **A2:** The AP-10K dataset contains 10,015 images and 13,028 instances with keypoint annotations.  
57 Besides, AP-10K contains extra 49,643 images, where each image is only annotated with family and  
58 species labels, without keypoint annotations.

59 **3. Does the dataset contain all possible instances or is it a sample (not necessarily random)**  
60 **of instances from a larger set? If the dataset is a sample, then what is the larger set? Is**  
61 **the sample representative of the larger set (e.g., geographic coverage)? If so, please describe**  
62 **how this representativeness was validated/verified. If it is not representative of the larger set,**  
63 **please describe why not (e.g., to cover a more diverse range of instances, because instances**  
64 **were withheld or unavailable).**

65 **A3:** AP-10K is a real-world sample of animals, including information about their poses. It is the  
66 largest dataset in the area of animal pose estimation, *e.g.*,  $10\times$  more species compared with other  
67 previous datasets. Due to the diversity of real-world animal species, it is impossible to cover all  
68 instances of wild animals on a single dataset. The AP-10K dataset contains 23 typical families and  
69 54 species, which follows the taxonomic rank, providing a more diverse set of instances than ever  
70 before and will facilitate further studies of animal pose estimation. Biological proximity exploited  
71 in AP-10K may be used to help the model extend to more species in the wild.

72 **4. What data does each instance consist of? Raw data (e.g., unprocessed text or images) or**  
73 **features? In either case, please provide a description.**

74 **A4:** Each instance consists of one animal with its location (bounding box), family and species labels,  
75 keypoint annotations, and the unprocessed image data.

76 **5. Is there a label or target associated with each instance? If so, please provide a description.**

77 **A5:** Yes. Each target is associated with labels following the COCO-style, which contain the in-  
78 stance id, image id, category information (family and species), the box area, whether is crowded or  
79 not, the number of keypoints, detailed keypoints information (location and category), as well as the  
80 background category.

81 **6. Is any information missing from individual instances? If so, please provide a description,**  
82 **explaining why this information is missing (e.g., because it was unavailable). This does not**  
83 **include intentionally removed information, but might include, e.g., redacted text.**

84 **A6:** Yes. Some instances may not have the complete keypoint annotation due to occlusion, blur, or  
85 small scale, similar to those instances in the COCO human pose dataset. Therefore, the location and  
86 visibility of these keypoints are marked zero following the COCO-style.

87 **7. Are relationships between individual instances made explicit (e.g., users movie ratings, so-**  
88 **cial network links)? If so, please describe how these relationships are made explicit.**

89 **A7:** Yes. The instances' information are stored in the COCO-style, where the relationship between  
90 instances, *e.g.*, whether two instances belong to the same category or are on the same image, can be  
91 queried using the [COCO APIs](#).

92 **8. Are there recommended data splits (e.g., training, development/validation, testing)? If so,**  
93 **please provide a description of these splits, explaining the rationale behind them.**

94 **A8:** Yes. We randomly split the dataset into disjoint train, validation, and test sets following the  
95 ratio of 7:1:2. The splits are done within each species to keep the origin distribution.

96 **9. Are there any errors, sources of noise, or redundancies in the dataset? If so, please provide**  
97 **a description.**

98 **A9:** Although we have carefully double-check the annotations, there may be some inaccurate key-  
99 point annotations, *e.g.*, small drifts in the annotation of keypoint locations. To figure out the error  
100 rate of AP-10K annotations, we re-examine the annotations, and the results are available in Table [S6](#).

Table S6: Error rate in AP-10K.

| Number of Images | Total keypoints | Mislabeled keypoints | Error rate |
|------------------|-----------------|----------------------|------------|
| 10015            | 130142          | 15                   | 0.012%     |

101 **10. Is the dataset self-contained, or does it link to or otherwise rely on external resources (e.g.,**  
102 **websites, tweets, other datasets)? If it links to or relies on external resources, a) are there**  
103 **guarantees that they will exist, and remain constant, over time; b) are there official archival**  
104 **versions of the complete dataset (i.e., including the external resources as they existed at the**  
105 **time the dataset was created); c) are there any restrictions (e.g., licenses, fees) associated with**  
106 **any of the external resources that might apply to a future user? Please provide descriptions**  
107 **of all external resources and any restrictions associated with them, as well as links or other**  
108 **access points, as appropriate.**

109 **A10:** The AP-10K is comprised of the publicly available datasets, including African Wildlife [\[6\]](#),  
110 Animal-Pose Dataset [\[3\]](#), Animal Image Dataset(DOG, CAT and PANDA) [\[11\]](#), Endangered An-  
111 imals [\[8\]](#), IUCN Animals Dataset [\[2\]](#), Animals with Attributes 2 [\[14\]](#), Animals-5 [\[12\]](#), Animals-  
112 10 [\[1\]](#), and Wild Cats [\[16\]](#). These datasets are publicly available and can be downloaded from their  
113 websites, *e.g.*, the Animals-10 dataset follows the GPL v2 license while Endangered Animals fol-  
114 lows the CC-BY-4.0 license. We appreciate the significant contribution of the authors to the research  
115 community. Table [S7](#) shows the number of images contained in the each dataset that contribute to  
116 the AP-10K dataset.

Table S7: The source dataset adopted in AP-10K.

| Source Dataset                                | Number of Images |
|-----------------------------------------------|------------------|
| African Wildlife [6]                          | 1454             |
| Animal Image Dataset(DOG, CAT and PANDA) [11] | 2753             |
| Animal-Pose [3]                               | 970              |
| Animals with Attributes 2 [14]                | 31701            |
| Animals-5 [12]                                | 5110             |
| Animals-10 [1]                                | 14029            |
| Endangered Animals [8]                        | 284              |
| IUCN Animals Dataset [2]                      | 1689             |
| Wild Cats [16]                                | 1558             |
| Internet                                      | 110              |

117 **11. Does the dataset contain data that might be considered confidential (e.g., data that is**  
118 **protected by legal privilege or by doctor/patient confidentiality, data that includes the content**  
119 **of individuals non-public communications)? If so, please provide a description.**

120 **A11:** No.

121 **12. Does the dataset contain data that, if viewed directly, might be offensive, insulting, threat-**  
122 **ening, or might otherwise cause anxiety? If so, please describe why.**

123 **A12:** No.

#### 124 **A.4 Collection Process**

125 **1. How was the data associated with each instance acquired? Was the data directly observ-**  
126 **able (e.g., raw text, movie ratings), reported by subjects (e.g., survey responses), or indirectly**  
127 **inferred/derived from other data (e.g., part-of-speech tags, model-based guesses for age or lan-**  
128 **guage)? If data was reported by subjects or indirectly inferred/derived from other data, was**  
129 **the data validated/verified? If so, please describe how.**

130 **A1:** The data associated with each instance are directly observable, as they are stored as the common  
131 COCO format and can be easily viewed via the [COCO APIs](#).

132 **2. What mechanisms or procedures were used to collect the data (e.g., hardware apparatus**  
133 **or sensor, manual human curation, software program, software API)? How were these mecha-**  
134 **nisms or procedures validated?**

135 **A2:** The images in AP-10K come from dataset publicly available datasets described above, which  
136 can be directly downloaded from their websites.

137 **3. If the dataset is a sample from a larger set, what was the sampling strategy (e.g., determin-**  
138 **istic, probabilistic with specific sampling probabilities)?**

139 **A3:** No.

140 **4. Who was involved in the data collection process (e.g., students, crowdworkers, contractors)**  
141 **and how were they compensated (e.g., how much were crowdworkers paid)?**

142 **A4:** The first author of this paper.

143 **5. Over what timeframe was the data collected? Does this timeframe match the creation**  
144 **timeframe of the data associated with the instances (e.g., recent crawl of old news articles)? If**  
145 **not, please describe the timeframe in which the data associated with the instances was created.**

146 **A5:** It took about 1 day to collect the data and about 3 months to complete organization and annota-  
147 tion, as each participant labelled the bounding boxes and keypoints about one hour per workday.

#### 148 **A.5 Preprocessing/cleaning/labeling**

149 **1. Was any preprocessing/cleaning/labeling of the data done (e.g., discretization or bucketing,**  
150 **tokenization, part-of-speech tagging, SIFT feature extraction, removal of instances, processing**

151 of missing values)? If so, please provide a description. If not, you may skip the remainder of  
152 the questions in this section.

153 **A1:** We remove replicated images by using aHash [4] to detect similar images and manually check-  
154 ing. Then, images with heavy occlusion and logos are removed manually. These images are cate-  
155 gorized into family and species, which are double checked by the annotators to ensure the image  
156 quality of AP-10K. Next, the annotators after training start to annotate the images.

157 During training, annotators first learned about the physiognomy, body structure and distribution of  
158 keypoints of the animals. Then, five images of each species were presented to annotators to annotate  
159 keypoints, which were used to assess their annotation quality. Annotators with good annotation  
160 quality were further trained on how to deal with the partial absence of the body due to occlusion and  
161 were involved in the subsequent annotation process. Annotators were asked to annotate all visible  
162 keypoints. For the occluded keypoints, they were asked to annotate keypoints whose location they  
163 could estimate based on body plan, pose, and the symmetry property of the body, where the length  
164 of occluded limbs or the location of occluded keypoints could be inferred from the visible limbs or  
165 keypoints. Other keypoints were left unlabeled. As shown in Figure 1, the right limb of the polar  
166 bear on the right could not be estimated accurately, so the annotator did not annotate it, while the  
167 right limb of the panda was annotated because it could be easily estimated from their pose and the  
168 symmetry property of the body.

169 To guarantee the annotation quality, we have adopted a sequential labeling strategy. Three rounds of  
170 cross-check and correction are conducted with both manual check and automatic check (according  
171 to specific rules, *e.g.*, keypoints belonging to an instance are in the same bounding box) to reduce  
172 the possibility of mislabeling.

173 **2. Was the raw data saved in addition to the preprocessed/cleaned/labeled data (e.g., to support**  
174 **unanticipated future uses)? If so, please provide a link or other access point to the raw data.**

175 **A2:** No.

176 **3. Is the software used to preprocess/clean/label the instances available? If so, please provide**  
177 **a link or other access point.**

178 **A3:** We use the open source labelling [tool](#).

## 179 **A.6 Uses**

180 **1. Has the dataset been used for any tasks already? If so, please provide a description.**

181 **A1:** No.

182 **2. Is there a repository that links to any or all papers or systems that use the dataset? If so,**  
183 **please provide a link or other access point.**

184 **A2:** N/A.

185 **3. What (other) tasks could the dataset be used for?**

186 **A3:** AP-10K can be used for the research of animal pose estimation. Besides, it can also be used for  
187 specific machine learning topics such as few-shot learning, domain generalization, self-supervised  
188 learning. Please see the Discussion part in the paper.

189 **4. Is there anything about the composition of the dataset or the way it was collected and**  
190 **preprocessed/cleaned/labeled that might impact future uses? For example, is there anything**  
191 **that a future user might need to know to avoid uses that could result in unfair treatment of**  
192 **individuals or groups (e.g., stereotyping, quality of service issues) or other undesirable harms**  
193 **(e.g., financial harms, legal risks) If so, please provide a description. Is there anything a future**  
194 **user could do to mitigate these undesirable harms?**

195 **A4:** No.

196 **5. Are there tasks for which the dataset should not be used? If so, please provide a description.**

197 **A5:** No.

198 **A.7 Distribution**

199 **1. Will the dataset be distributed to third parties outside of the entity (e.g., company, institu-**  
200 **tion, organization) on behalf of which the dataset was created? If so, please provide a descrip-**  
201 **tion.**

202 **A1:** Yes. The dataset will be made publicly available to the research community.

203 **2. How will the dataset will be distributed (e.g., tarball on website, API, GitHub)? Does the**  
204 **dataset have a digital object identifier (DOI)?**

205 **A2:** It will be publicly available on the project website at [GitHub](#).

206 **3. When will the dataset be distributed?**

207 **A3:** The dataset will be distributed once the paper is accepted after peer-review.

208 **4. Will the dataset be distributed under a copyright or other intellectual property (IP) license,**  
209 **and/or under applicable terms of use (ToU)? If so, please describe this license and/or ToU, and**  
210 **provide a link or other access point to, or otherwise reproduce, any relevant licensing terms or**  
211 **ToU, as well as any fees associated with these restrictions.**

212 **A4:** It will be distributed under the MIT licence.

213 **5. Have any third parties imposed IP-based or other restrictions on the data associated with**  
214 **the instances? If so, please describe these restrictions, and provide a link or other access point**  
215 **to, or otherwise reproduce, any relevant licensing terms, as well as any fees associated with**  
216 **these restrictions.**

217 **A5:** No.

218 **6. Do any export controls or other regulatory restrictions apply to the dataset or to individual**  
219 **instances? If so, please describe these restrictions, and provide a link or other access point to,**  
220 **or otherwise reproduce, any supporting documentation.**

221 **A6:** No.

222 **A.8 Maintenance**

223 **1. Who will be supporting/hosting/maintaining the dataset?**

224 **A1:** The authors.

225 **2. How can the owner/curator/manager of the dataset be contacted (e.g., email address)?**

226 **A2:** They can be contacted via email available on the project website.

227 **3. Is there an erratum? If so, please provide a link or other access point.**

228 **A3:** No.

229 **4. Will the dataset be updated (e.g., to correct labeling errors, add new instances, delete in-**  
230 **stances)? If so, please describe how often, by whom, and how updates will be communicated**  
231 **to users (e.g., mailing list, GitHub)?**

232 **A4:** No. We have carefully double checked the annotations to reduce the labeling errors. There may  
233 be a very few of labeling errors, which can be treated as noise.

234 **5. Will older versions of the dataset continue to be supported/hosted/maintained? If so, please**  
235 **describe how. If not, please describe how its obsolescence will be communicated to users.**

236 **A5:** N/A.

237 **6. If others want to extend/augment/build on/contribute to the dataset, is there a mecha-**  
238 **nism for them to do so? If so, please provide a description. Will these contributions be**  
239 **validated/verified? If so, please describe how. If not, why not? Is there a process for com-**  
240 **municating/distributing these contributions to other users? If so, please provide a description.**

241 **A6:** N/A.



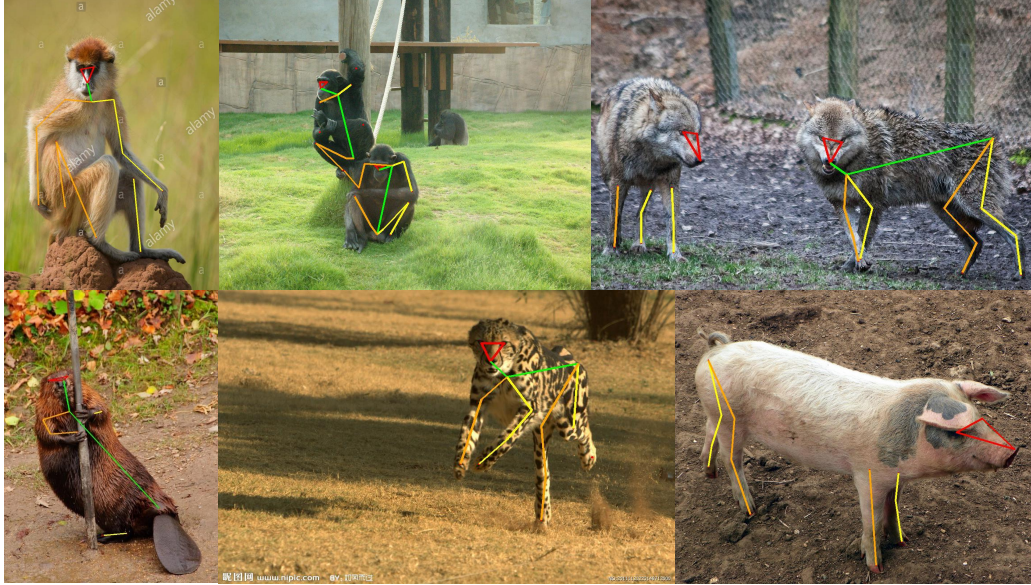

Figure S1: representative examples of failures of the pose estimation in our AP-10K.

## References

- [1] C. Alessio. Animals 10. <https://www.kaggle.com/alessiocorrado99/animals10>, 2019.
- [2] antoreepjana. Iucn animals dataset. <https://www.kaggle.com/antoreepjana/iucn-animals-dataset>, 2021.
- [3] J. Cao, H. Tang, H.-S. Fang, X. Shen, C. Lu, and Y.-W. Tai. Cross-domain adaptation for animal pose estimation. In *The IEEE International Conference on Computer Vision (ICCV)*, October 2019.
- [4] B. P. CLi Weng. A secure perceptual hash algorithm for image content authentication. 2011.
- [5] J. Deng, W. Dong, R. Socher, L.-J. Li, K. Li, and L. Fei-Fei. Imagenet: A large-scale hierarchical image database. In *2009 IEEE conference on computer vision and pattern recognition*, pages 248–255. Ieee, 2009.
- [6] B. Ferreira. African wildlife. <https://www.kaggle.com/biancaferreira/african-wildlife>, 2021.
- [7] K. He, X. Zhang, S. Ren, and J. Sun. Deep residual learning for image recognition. In *Proceedings of the IEEE conference on computer vision and pattern recognition*, pages 770–778, 2016.
- [8] S. Jamil. Endangered animals. <https://www.kaggle.com/sonain/endangered-animals>, 2020.
- [9] T.-Y. Lin, M. Maire, S. Belongie, J. Hays, P. Perona, D. Ramanan, P. Dollár, and C. L. Zitnick. Microsoft coco: Common objects in context. In *European conference on computer vision*, pages 740–755. Springer, 2014.
- [10] A. Newell, K. Yang, and J. Deng. Stacked hourglass networks for human pose estimation. In *European conference on computer vision*, pages 483–499. Springer, 2016.
- [11] A. Saxena. Animal image dataset(dog, cat and panda). <https://www.kaggle.com/ashishsaxena2209/animal-image-datasetdog-cat-and-panda>, 2019.
- [12] Y. V. Trivedi. Animals 5. <https://www.kaggle.com/ytrivedi1/animals-5>, 2020.
- [13] J. Wang, K. Sun, T. Cheng, B. Jiang, C. Deng, Y. Zhao, D. Liu, Y. Mu, M. Tan, X. Wang, et al. Deep high-resolution representation learning for visual recognition. *IEEE transactions on pattern analysis and machine intelligence*, 2020.
- [14] Y. Xian, C. H. Lampert, B. Schiele, and Z. Akata. Zero-shot learninga comprehensive evaluation of the good, the bad and the ugly. *IEEE transactions on pattern analysis and machine intelligence*, 41(9):2251–2265, 2018.
- [15] B. Xiao, H. Wu, and Y. Wei. Simple baselines for human pose estimation and tracking. In *Proceedings of the European conference on computer vision (ECCV)*, pages 466–481, 2018.
- [16] E. ahovi. wild cats. <https://www.kaggle.com/enisahovi/cats-projekat-4>, 2020.

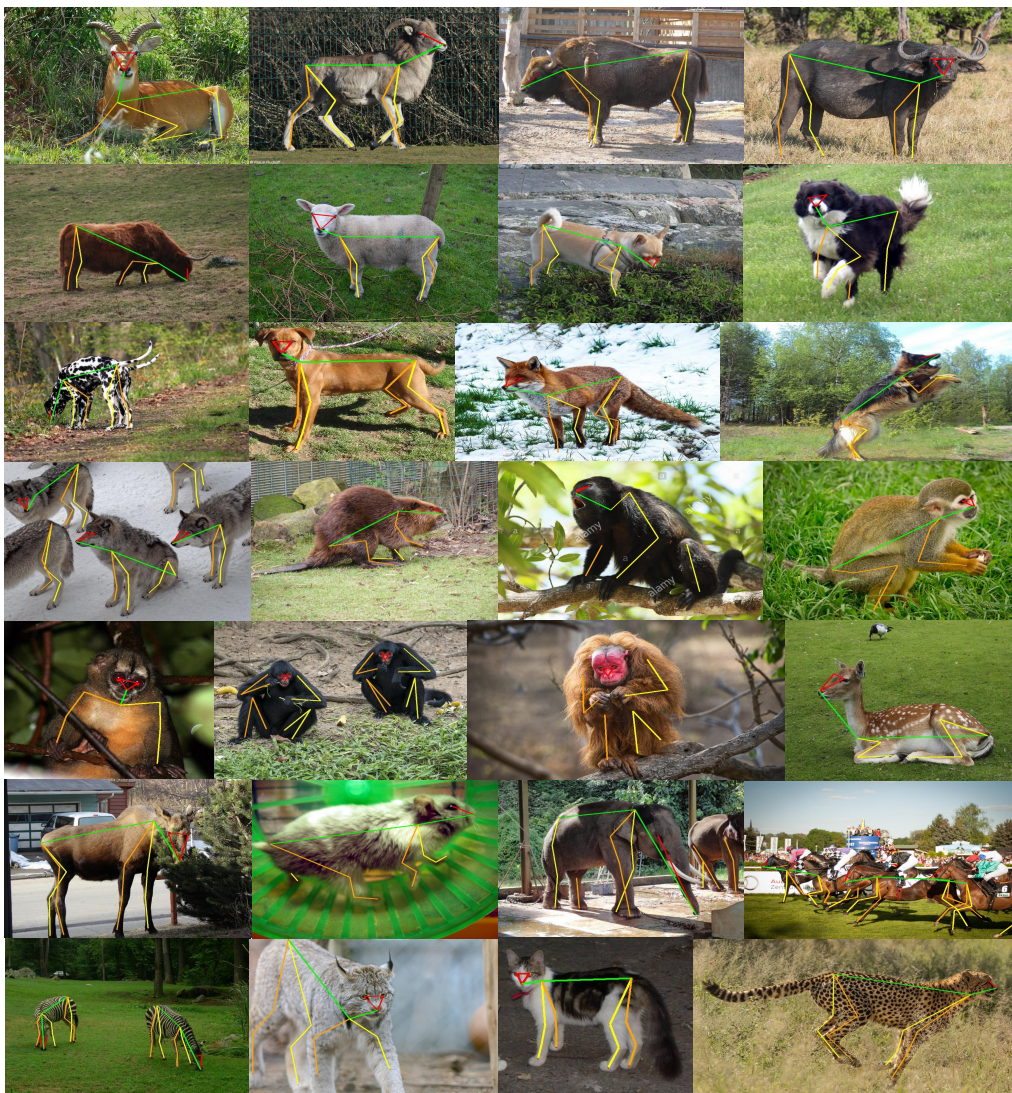

Figure S2: Some visual examples of animal species and annotations in our AP-10K.



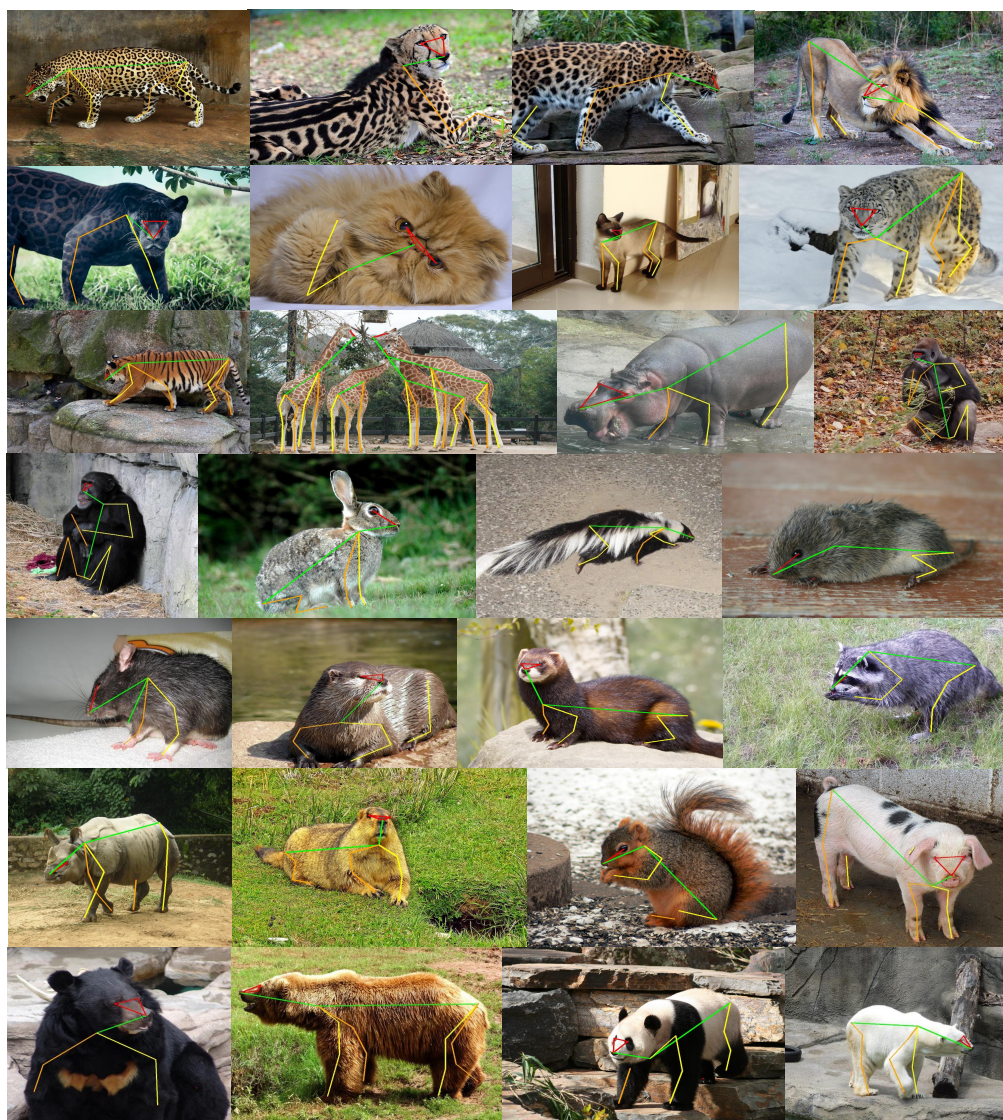

Figure S3: Some visual examples of animal species and annotations in our AP-10K.



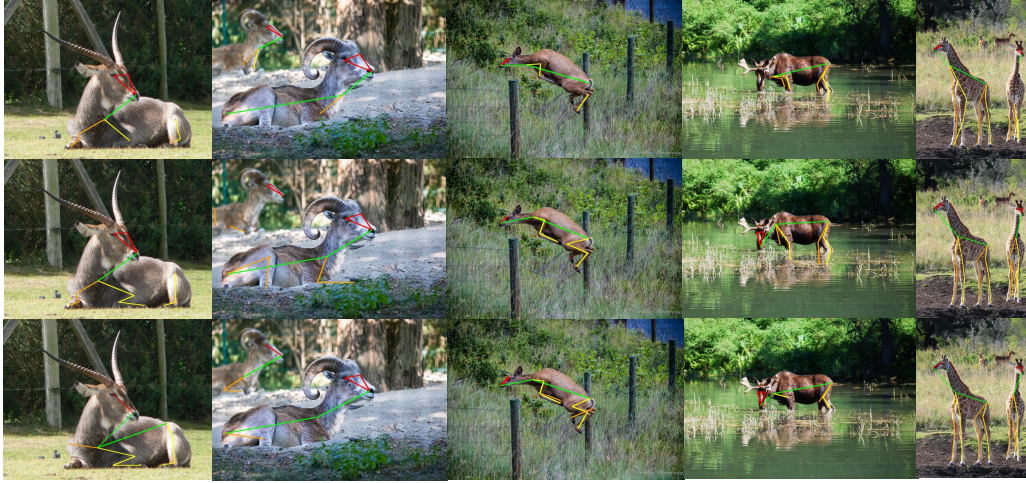

Figure S4: More qualitative results of HRNet-w32 trained on the Animal Pose dataset [3] (the first row) and our AP-10K dataet (the second row). The ground truth poses are shown in the last row. These animals are Antelope, Argali Sheep, Deer, Moose, and Giraffe, respectively.

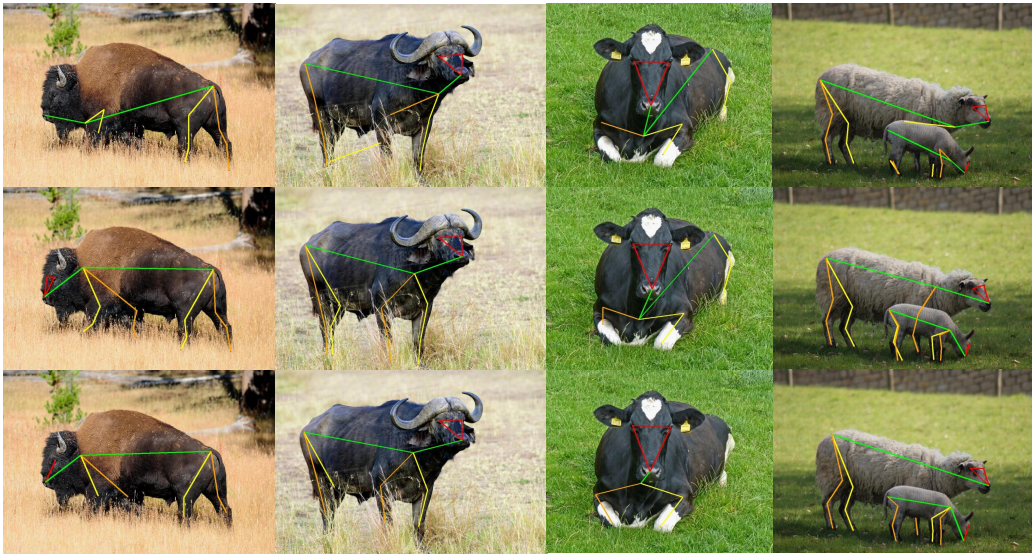

Figure S5: More qualitative results of HRNet-w32 trained on the Animal Pose dataset [3] (the first row) and our AP-10K dataet (the second row). The ground truth poses are shown in the last row. These animals are Bison, Buffalo, Cow, and Sheep, respectively.



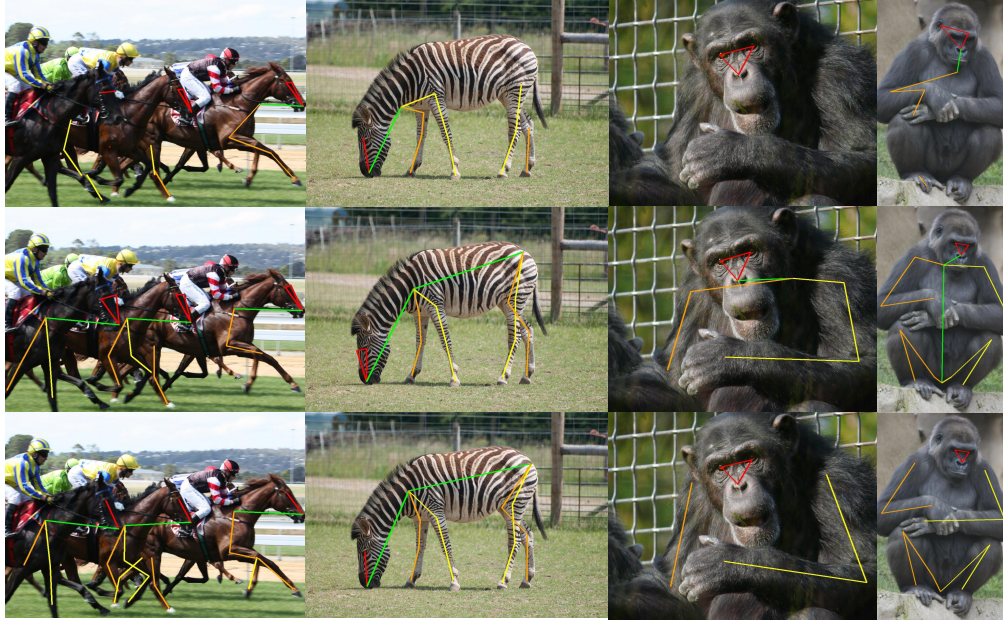

Figure S6: More qualitative results of HRNet-w32 trained on the Animal Pose dataset [3] (the first row) and our AP-10K dataet (the second row). The ground truth poses are shown in the last row. These animals are Horse, Zebra, Chimpanzee, and Gorilla, respectively.

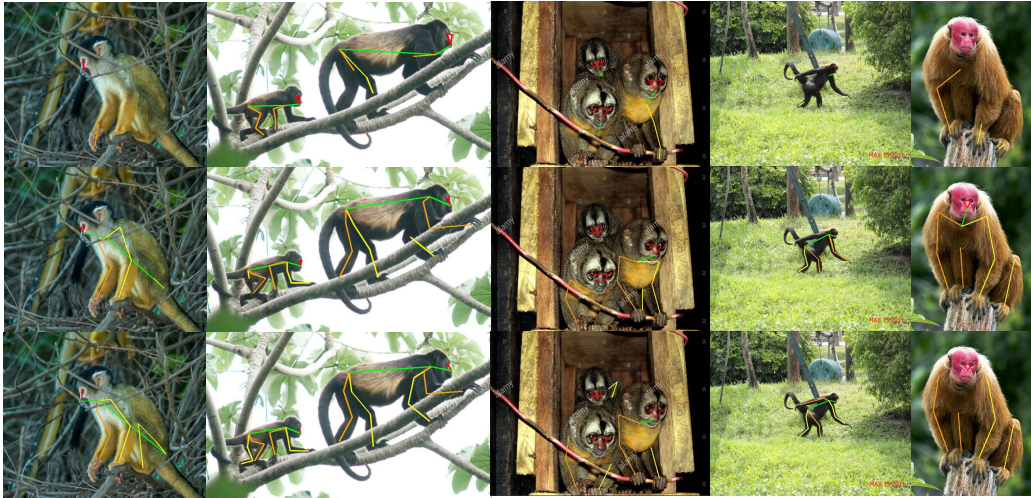

Figure S7: More qualitative results of HRNet-w32 trained on the Animal Pose dataset [3] (the first row) and our AP-10K dataet (the second row). The ground truth poses are shown in the last row. These animals are Monkey, Alouatta, Noisy Night Monkey, Spider Monkey, and Uakari, respectively.

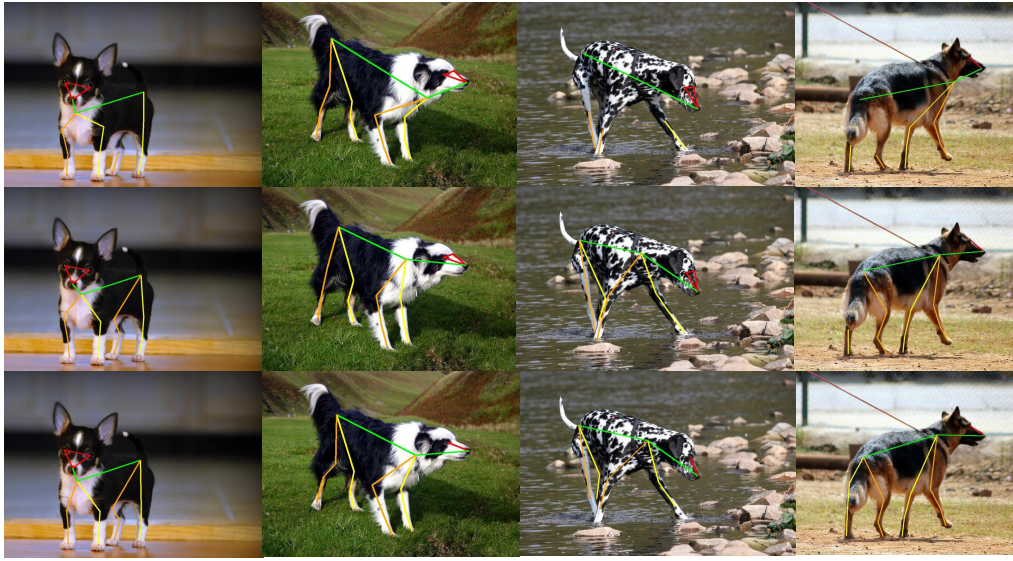

Figure S8: More qualitative results of HRNet-w32 trained on the Animal Pose dataset [3] (the first row) and our AP-10K dataet (the second row). The ground truth poses are shown in the last row. These animals are Chihuahua, Collie, Dalmatian, and German Shepherd, respectively.



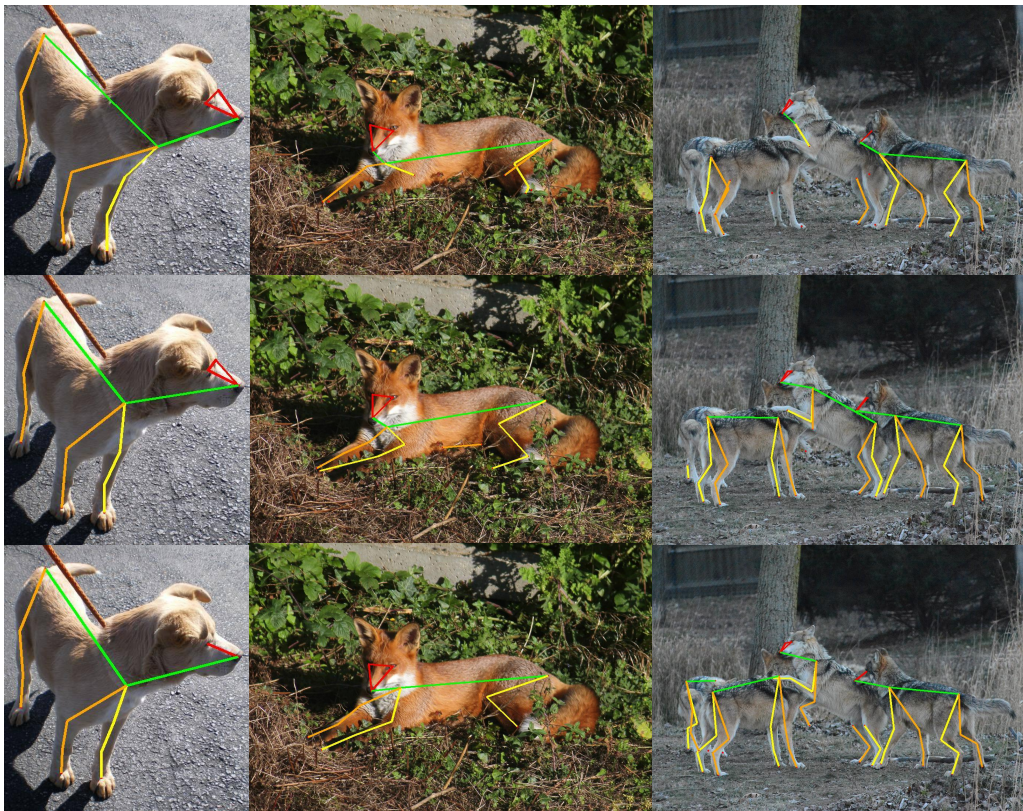

Figure S9: More qualitative results of HRNet-w32 trained on the Animal Pose dataset [3] (the first row) and our AP-10K dataset (the second row). The ground truth poses are shown in the last row. These animals are Dog, Fox, and Wolf, respectively.



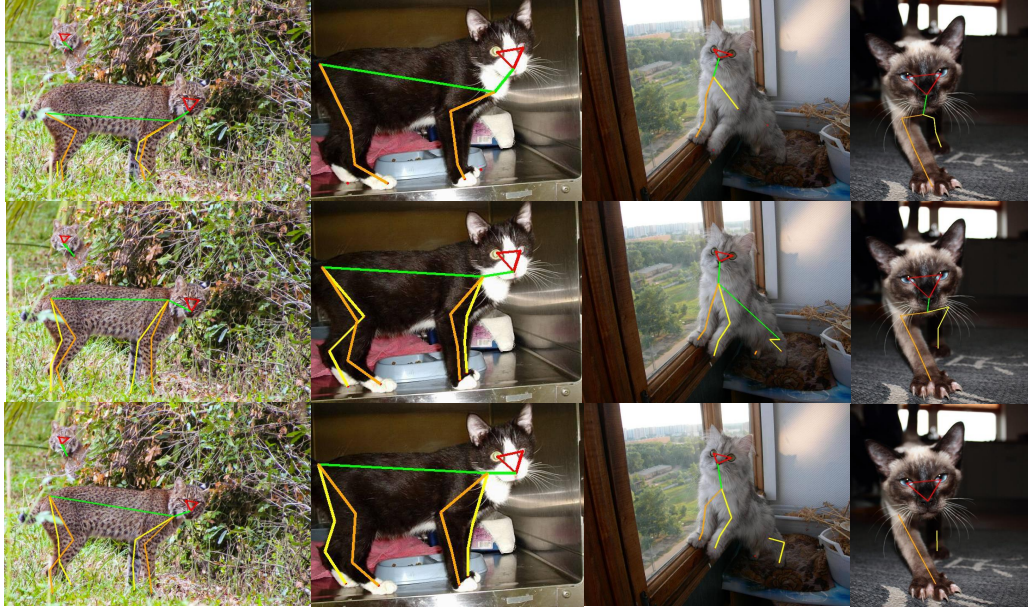

Figure S10: More qualitative results of HRNet-w32 trained on the Animal Pose dataset [3] (the first row) and our AP-10K dataset (the second row). The ground truth poses are shown in the last row. These animals are Bobcat, Cat, Persian Cat, and Siamese Cat, respectively.

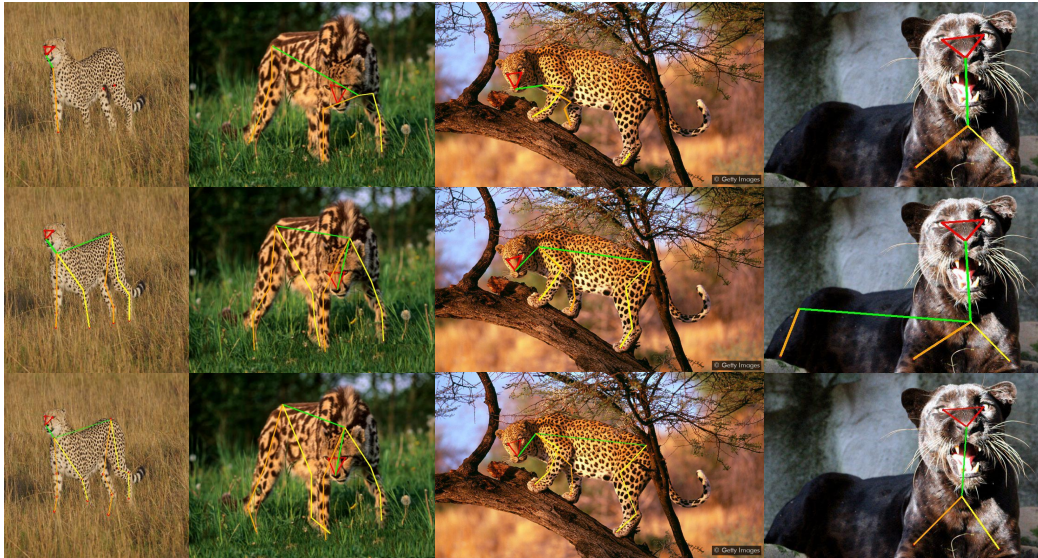

Figure S11: More qualitative results of HRNet-w32 trained on the Animal Pose dataset [3] (the first row) and our AP-10K dataset (the second row). The ground truth poses are shown in the last row. These animals are Cheetah, King Cheetah, Leopard, and Panther, respectively.



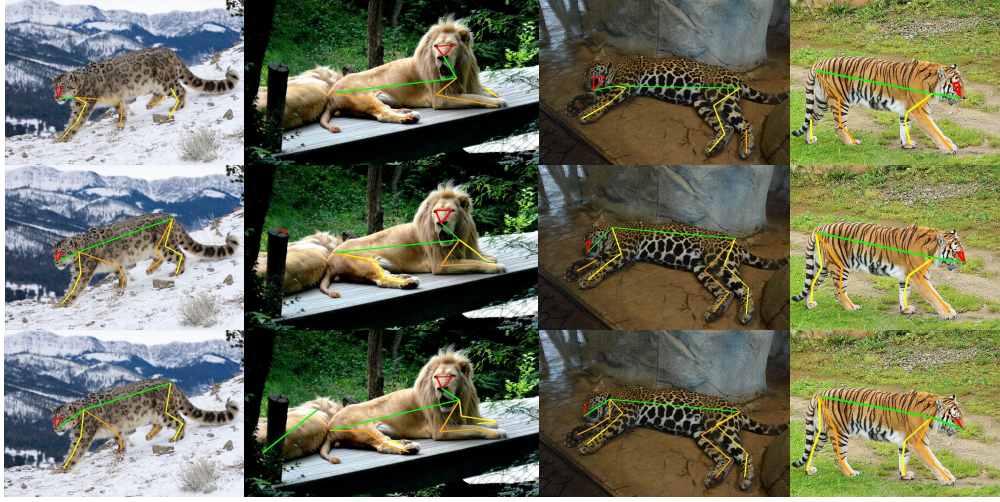

Figure S12: More qualitative results of HRNet-w32 trained on the Animal Pose dataset [3] (the first row) and our AP-10K dataet (the second row). The ground truth poses are shown in the last row. These animals are Snow Leopard, Lion, Jaguar, and Tiger, respectively.

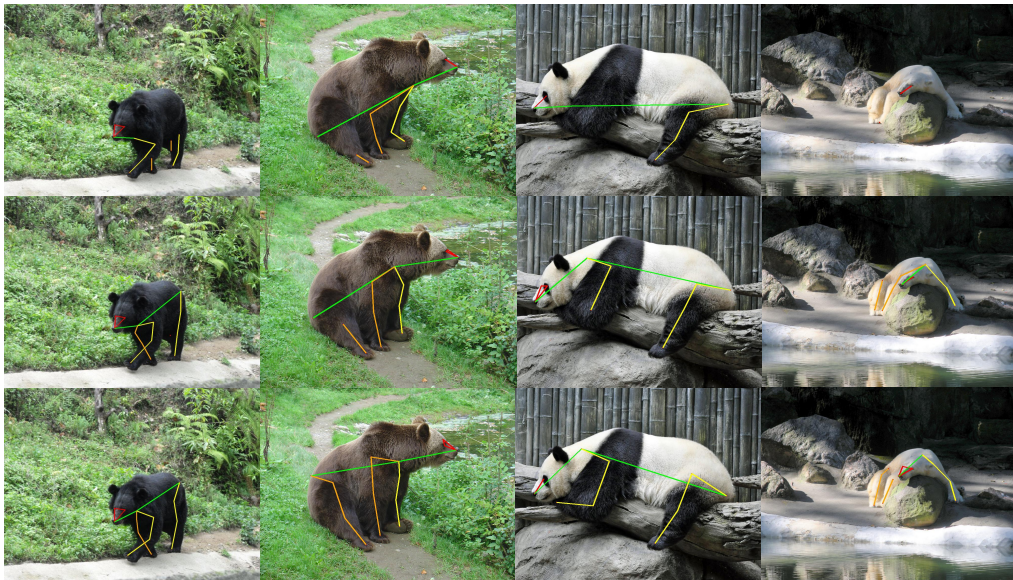

Figure S13: More qualitative results of HRNet-w32 trained on the Animal Pose dataset [3] (the first row) and our AP-10K dataet (the second row). The ground truth poses are shown in the last row. These animals are Black Bear, Brown Bear, Panda, and Polar Bear, respectively.



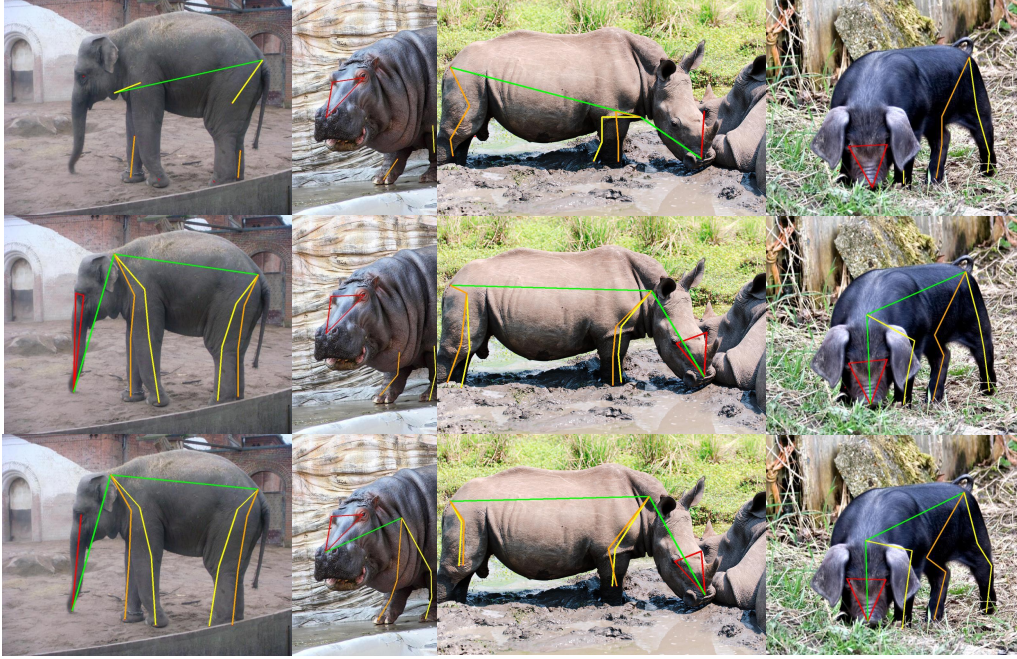

Figure S14: More qualitative results of HRNet-w32 trained on the Animal Pose dataset [3] (the first row) and our AP-10K dataet (the second row). The ground truth poses are shown in the last row. Elephant, Hippo, Rhino, and Pig, respectively.

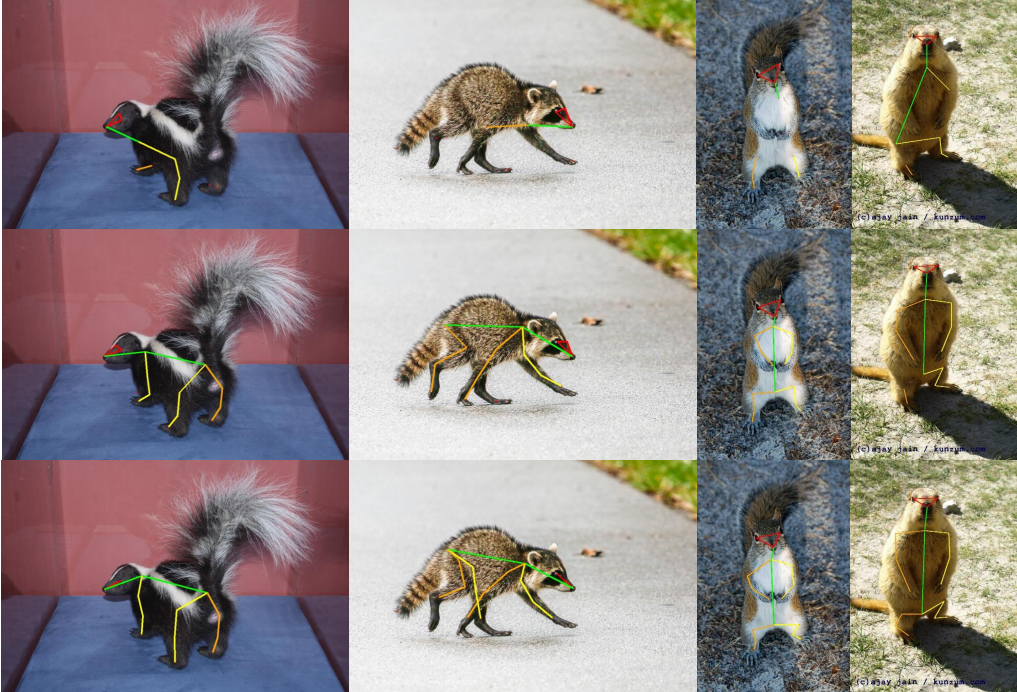

Figure S15: More qualitative results of HRNet-w32 trained on the Animal Pose dataset [3] (the first row) and our AP-10K dataet (the second row). The ground truth poses are shown in the last row. These animals are Skunk, Raccoon, Squirrel, and Marmot, respectively.



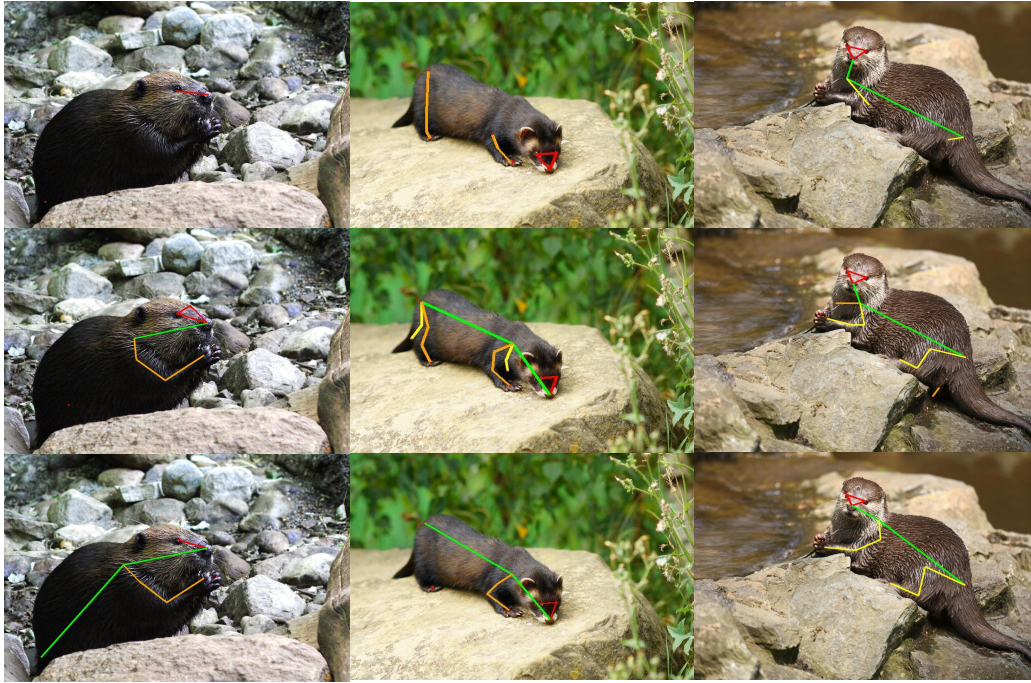

Figure S16: More qualitative results of HRNet-w32 trained on the Animal Pose dataset [3] (the first row) and our AP-10K dataet (the second row). The ground truth poses are shown in the last row. These animals are Beaver, Otter, and Weasel, respectively.

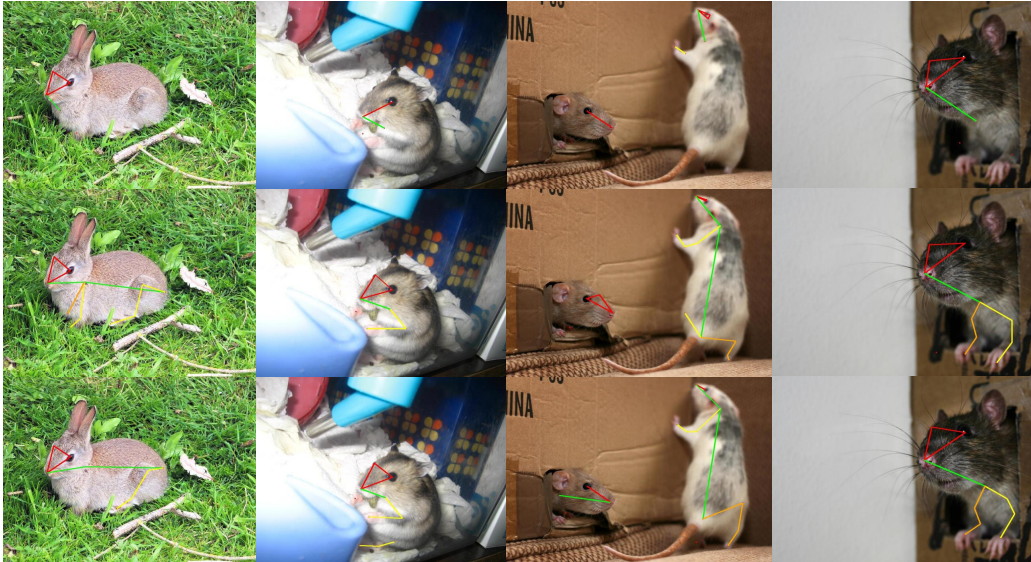

Figure S17: More qualitative results of HRNet-w32 trained on the Animal Pose dataset [3] (the first row) and our AP-10K dataet (the second row). The ground truth poses are shown in the last row. These animals are Rabbit, Hamster, Mouse, and Rat, respectively.



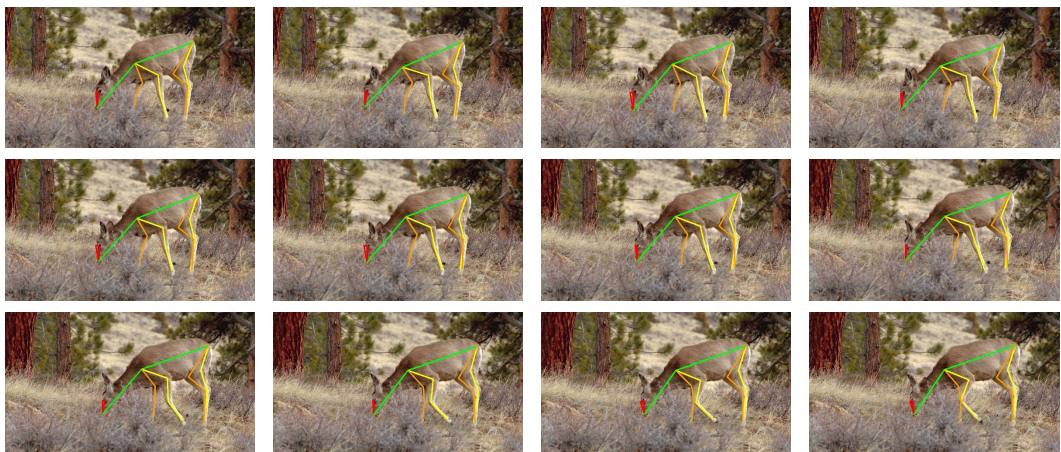

Figure S18: The results on video for animals in the wild.

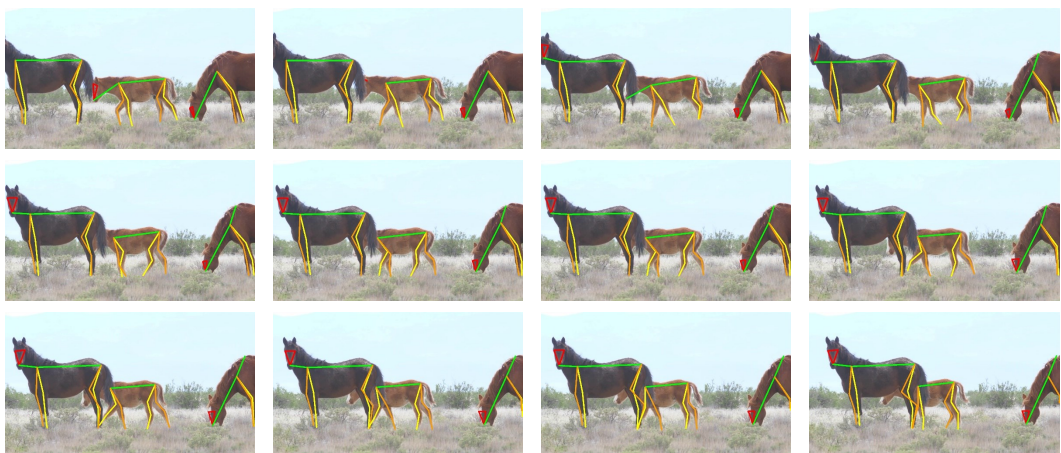

Figure S19: The results on video for animals in the wild.

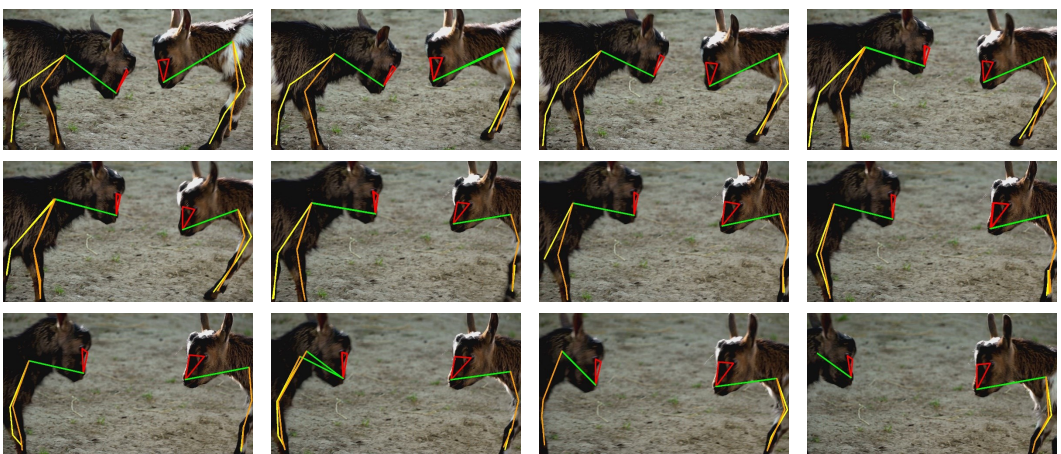

Figure S20: The results on video for animals in the wild.



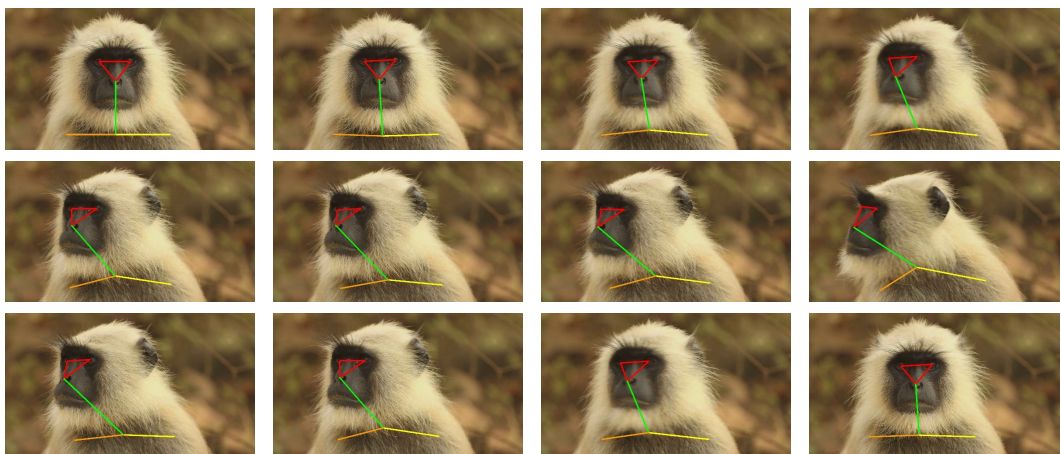

Figure S21: The results on video for animals in the wild.

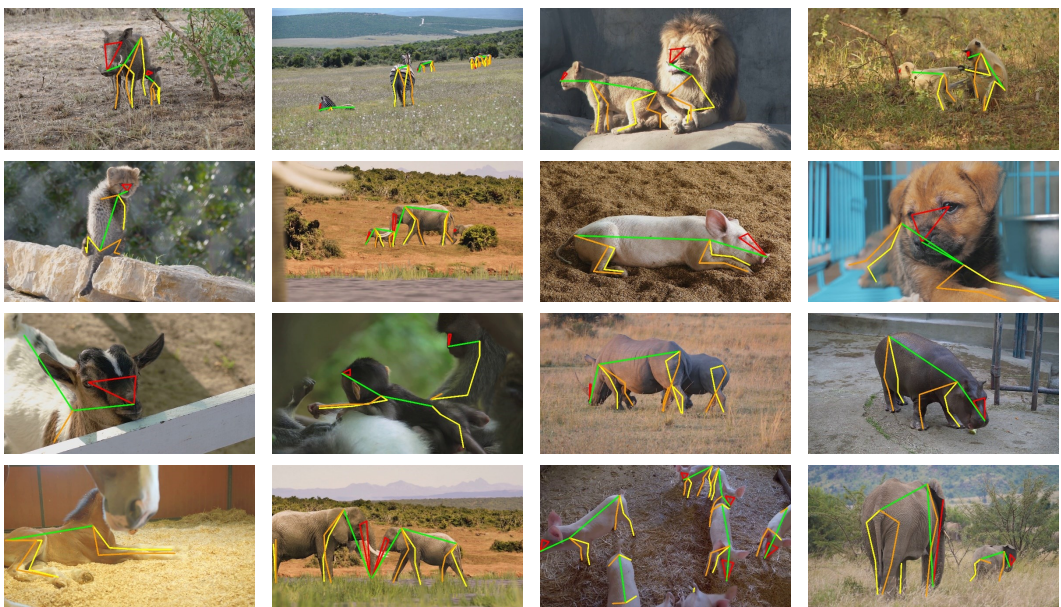

Figure S22: The results on video for animals in the wild (different scenes).
